1 **TGF- $\beta$  inhibitor accelerates BMP4-induced cochlear gap junction formation**  
2 **during *in vitro* differentiation of embryonic stem cells**

3

4

5

6 Ichiro Fukunaga, Cheng Chen, Yoko Oe, Keiko Danzaki, Sayaka Ohta, Akito Koike,

7 Ayumi Fujimoto, Katsuhisa Ikeda, Kazusaku Kamiya\*

8 Department of Otorhinolaryngology, Juntendo University Faculty of Medicine, Tokyo,

9 Japan

10

11 \*Corresponding author

12 E-mail: [kkamiya@juntendo.ac.jp](mailto:kkamiya@juntendo.ac.jp) (KK)

13

## 14 **Abstract**

15           Mutations in the connexin 26 (CX26)/gap junction beta-2 (*GJB2*) gene are the  
16 most frequent cause of hereditary deafness worldwide. Using mouse induced pluripotent  
17 stem cells (iPSCs) and a BMP4 signal-based floating and adherent culture system, we  
18 recently produced *in vitro* responsible for *GJB2*-related deafness (CX26-gap junction  
19 plaque-forming cells, CX26GJCs). However, to use these cells as a disease model  
20 platform for high-throughput drug screening or regenerative therapy, cell yields must be  
21 substantially increased. In addition to BMP4, presently uncharacterized factors may also  
22 induce CX26 gap junction (GJ) formation. A floating culture with embryonic stem cell  
23 (ESC) treatment and BMP4/TGF- $\beta$  inhibitor (SB431542:SB) has been shown to result  
24 in greater production of isolatable CX26-positive small vesicles (CX26+ vesicles) and  
25 higher *Gjb2* mRNA levels than BMP4 treatment alone, suggesting that SB may promote  
26 BMP4-mediated production of CX26+ vesicles in a dose-dependent manner, thereby  
27 increasing the yield of highly purified CX26GJCs.

28           In the present study, we first demonstrated that SB accelerates BMP4 induced  
29 GJ formation during stem cell differentiation. By controlling the concentration and  
30 timing of SB supplementation with CX26+ vesicle purification, large-scale production  
31 of highly purified CX26GJCs suitable for high-throughput drug screening or

32 regenerative therapy for *GJB2*-related deafness may be possible.

33

## 34 **Introduction**

35       Hearing loss is the most common congenital sensory impairment worldwide[1].  
36       Approximately 1 child in 1,000 is born with severe hearing loss or will develop hearing  
37       loss during early childhood, which is known as prelingual deafness[2, 3].  
38       Approximately half of such cases are attributable to genetic causes[4]. Mutations in the  
39       gap junction beta-2 (*GJB2*) gene, which encodes connexin 26 (CX26), are the most  
40       common genetic cause of non-syndromic sensorineural hearing loss, accounting for  
41       ~50% of such hearing loss in children[5, 6].

42       CX26 and CX30, encoded by *GJB6*, are expressed in non-sensory cochlear  
43       supporting cells and in such cochlear structures as the spiral limbus, stria vascularis, and  
44       spiral ligament[7-12]. In contrast, CXs are not expressed in hair cells[9, 11-13].

45       CX26 and CX30 have been shown to form functional heteromeric and heterotypic  
46       gap junction (GJ) channels in the cochlea[14] as well as in *in vitro* experiments[15]. At  
47       the plasma membrane, GJs further assemble into semi-crystalline arrays known as gap  
48       junction plaques (GJPs) containing tens to thousands of GJs[16].

49       GJs facilitate the rapid removal of  $K^+$  from the base of cochlear hair cells,  
50       resulting in cycling of  $K^+$  back into the endolymph of the cochlea to maintain cochlear  
51       homeostasis[17]. Several studies have reported that the deletion of *GJB2* can cause

52 cochlear developmental disorders besides deafness, such as tunnel of Corti, Nuel's  
53 space, or spaces surrounding the outer hair cells[18-23].

54 We previously showed that disruption of CX26-GJPs is associated with  
55 *Gjb2*-related hearing-loss pathogenesis and that assembly of cochlear GJPs is dependent  
56 on CX26[24]. Thereafter, we showed that the transfer of *Gjb2* into the cochleae using an  
57 adeno-associated virus significantly improved GJP formation and auditory functions in  
58 a mouse model[25].

59 Furthermore, we have recently reported that induced pluripotent stem cells  
60 (iPSCs)-derived functional CX26-GJP-forming cells (CX26GJCs), as found in the  
61 cochlea supporting cells[26], which is unlike previous studies that targeted the  
62 generation of cochlear hair cells from embryonic stem cells (ESCs) and iPSCs[27-39].

63 Thus, CX26GJC could be generated from a floating culture (SFEBq culture; a  
64 serum-free floating culture of embryoid body-like aggregates with quick reaggregation)  
65 followed by an adherent culture[26].

66 SFEBq culture is superior for generating ectoderm-derived tissues, which can give  
67 rise to forebrain, midbrain, adenohypophysis, retinal tissue, and otic sensory  
68 epithelia[29, 38, 40-45]. Furthermore, in SFEBq culture, ectodermal tissues develop in  
69 an epithelial form similar to that in *in vivo* counterparts.

70 However, to use these cells as a disease model for drug screening or other large-scale  
71 assays, the cell culture system must be improved to increase the number of cells  
72 available at a single time. Our previous research suggested that CX26 expressing  
73 vesicles formed in day 7 aggregate are the origin of CX26-GFP-forming cells in the 2D  
74 culture[26]. If CX26 small vesicles in SFEBq culture from ES/iPS cells could be  
75 obtained in a substantial quantity, we could obtain an adequate number of  
76 CX26-GFP-forming cells in the 2D culture.

77 Several studies have shown that BMP4 signaling plays a key role in embryonic  
78 development[46-50] and *in vitro* differentiation of ESCs/iPSCs[51-53].

79 In SFEBq culture, BMP4 upregulated a non-neural ectoderm marker (*Dlx3*) and  
80 downregulated a neuroectoderm marker (*Sox1*)[29]. Furthermore, BMP4 drives CX  
81 expression and CX-mediated cell-to-cell communication[54-56].

82 Similarly, TGF- $\beta$  inhibitor (SB431542:SB) has been implicated in efficient neural  
83 conversion of ESCs and iPSCs via inhibition of SMAD signaling[57, 58], and by  
84 blocking the progression of stem cell differentiation toward trophoderm, mesoderm,  
85 and endoderm lineages[59]. In SFEBq culture using mouse ESCs, SB inhibition of  
86 TGF- $\beta$  signaling is thought to promote proper non-neural induction following BMP4  
87 treatment[29, 60]. Although cochlear CX26-GFP-forming cells in cochlear non-sensory

88 regions should be part of the non-neural ectoderm, it has not been determined whether

89 SB can accelerate BMP4-induced CX expression or GJ formation.

90         Given this background, we hypothesized that SB plays a key role in the

91 differentiation of CX26GJCs. Therefore, in the present study, we evaluated modified

92 SFEBq culture conditions incorporating BMP4 and/or SB with the aim of generating

93 CX26GJCs from mouse ESCs with a greater potential to differentiate than that of

94 iPSCs. The large-scale production of CX26-GJP-forming cells could be used for

95 high-throughput drug screening related to deafness induced by mutations in *GJB2*.

96

## 97 **Materials and methods**

98 All the experimental protocols using mouse tissues were approved by the  
99 Institutional Animal Care and Use Committee at Juntendo University School of  
100 Medicine and were conducted in accordance with the US National Institutes of Health  
101 Guidelines for the Care and Use of Laboratory Animals. Adult mice (10-weeks-old)  
102 were obtained from CLEA Japan, Inc. All methods were carried out in accordance with  
103 relevant guidelines and regulations.

104

## 105 **ESC culture**

106 Mouse ESCs (EB5 cells)[61, 62] were provided by the RIKEN Bio Resource  
107 Center Cell Bank and maintained under feeder-free conditions with 2i-LIF medium[63].  
108 Briefly, ESCs were maintained on gelatin containing N2B27 medium consisting of a 1:1  
109 (v/v) mixture of Advanced DMEM/F12 and neurobasal medium (Invitrogen)  
110 supplemented with 1 mM GlutaMAX (Invitrogen), 1% N2 supplement (Invitrogen), 2%  
111 B27 supplement (Invitrogen), 3  $\mu$ M CHIR99021 (Stemgent), 1  $\mu$ M PD0325901 (Santa  
112 Cruz), and 1,000 U ml<sup>-1</sup> of leukemia inhibitory factor (Millipore).

113



## 114 **Differentiation of ESCs**

115 Induction of CX26GJCs was performed as shown in Fig 1A. Briefly, ESCs were  
116 dissociated with Accutase (Innovative Cell Technologies, Inc.), suspended in  
117 differentiation medium (G-MEM, Gibco) supplemented with 1.5% (v/v) knockout  
118 serum replacement (Gibco), 0.1 mM nonessential amino acids (Gibco), 1 mM sodium  
119 pyruvate (Gibco), and 0.1 mM 2-mercaptoethanol), and then plated at 100  $\mu$ l per well  
120 (3,000 cells) in 96-well low-cell attachment V-bottom plates (Sumitomo Bakelite).  
121 Recombinant BMP4 was obtained from Miltenyi Biotec and SB431542 was obtained  
122 from Tocris Bioscience. On day 1, half of the medium (50  $\mu$ l) per well was replaced  
123 with fresh differentiation medium containing 4% (v/v) Matrigel (BD Bioscience). On  
124 day 3, one of three types of media was added to the culture: medium containing BMP4  
125 (10 ng/ml, final concentration), SB (1–10  $\mu$ M, final concentration), or both factors at the  
126 aforementioned concentrations.

127

128 **Fig 1. Culture conditions for cells expressing high levels of *Gjb2* (CX26) and *Gjb6***  
129 **(CX30) mRNA. (A):** A schematic procedure for differentiating Connexin26 gap  
130 junctional plaque forming cells (Cx26GJCs) from mouse ESCs. SFEBq; serum-free  
131 floating culture of embryoid body-like aggregates with quick reaggregation, KSR;

132 knockout serum replacement, SB431542; TGF-beta inhibitor. **(B)**: Relative expression  
133 of mRNA at day 0 (for undifferentiated ES cells) and at day 7 for untreated,  
134 BMP4-treated, SB-treated, and BMP4/SB-treated aggregates. The mRNA expression  
135 levels were normalized to those of BMP4 culture on day 7. (qRT-PCR: n = 5. For  
136 assessments, the procedures were repeated five times to generate cells. Each experiment  
137 used 8 aggregates. Differences between samples were assessed by One-way ANOVA  
138 and multiple comparison test; \*\*, p < 0.01. The data are expressed as mean ±standard  
139 error.

140

141 BMP4 and SB stock solutions were prepared at 5× concentration in fresh  
142 medium. On days 7–11, the aggregates were semi-dissected and the small vesicles were  
143 mechanically isolated and collected using forceps. The small vesicles were transferred  
144 into adherent culture containing TRICs in the growth medium, which was composed of  
145 DMEM GlutaMAX (Gibco) and 10% (w/v) FBS.

146 TRICs were generated by exposing cochlear tissue to trypsin and screening for  
147 trypsin-resistant cells. The mouse cochlear tissue (10-weeks-old) used for preparation of  
148 the TRICs included the organ of Corti, basilar membrane, and lateral wall, and mainly  
149 comprised supporting cells, hair cells, cochlear fibrocytes, and other cells in the basilar

150 membrane. This cell line was used as inner-ear derived feeder cells to proliferate the  
151 otic progenitor cells. For the feeder cell layer,  $3 \times 10^5/\text{cm}^2$  TRICs were seeded into  
152 gelatin-coated wells of 24-well culture plates after mitomycin C (10 mg/ml) treatment  
153 for 3 h.

154

### 155 **qRT-PCR of *Gjb2* and *Gjb6* mRNA expression**

156 Total RNA was isolated using reagents from an RNeasy Plus Mini kit (Qiagen) and  
157 reverse transcribed into cDNA using reagents from a Prime Script II first strand cDNA  
158 synthesis kit (Takara). Real-time PCR was performed with the reverse transcription  
159 products, TaqMan Fast Advanced Master Mix reagents (Applied Biosystems), and a  
160 gene-specific TaqMan Probe (see below; Applied Biosystems) on a StepOne Real-Time  
161 PCR system (Applied Biosystems). Each sample was run in triplicate. Applied  
162 Biosystems StepOne software was used to analyze the Ct values of the different  
163 mRNAs normalized to expression of the endogenous control, actin beta mRNA.  
164 TaqMan Probes (Assay ID; Applied Biosystems) were used to detect the expression of  
165 mouse *Gjb2* (Mm00433643\_s1), *Gjb6* (Mm00433661\_s1), and *actin beta* mRNAs  
166 (Mm02619580\_g1).

167

## 168 **Immunostaining and image acquisition**

169           Aggregates were fixed with 4% (w/v) paraformaldehyde in 0.01 M  
170 phosphate-buffered saline (PBS) for 1 h at room temperature. For whole mounts, the  
171 aggregates were permeabilized with 0.5% (w/v) Triton X-100 (Sigma-Aldrich) in 0.01  
172 M PBS for 30 min. Then, the samples were washed twice with 0.01 M PBS and blocked  
173 with 2% (w/v) bovine serum albumin in 0.01 M PBS for 30 min.

174           Cells from adherent cultures were fixed with 4% (w/v) paraformaldehyde in  
175 0.01 M PBS for 15 min at room temperature and, then, permeabilized with 0.5% (w/v)  
176 Triton X-100 in 0.01 M PBS for 5 min. Samples were washed twice with 0.01 M PBS  
177 and blocked with 2% (w/v) bovine serum albumin in 0.01 M PBS for 30 min. For  
178 immunofluorescence staining, 1% (w/v) bovine serum albumin in 0.01 M PBS was used  
179 to dilute the primary and secondary antibody solutions. Each sample was incubated in a  
180 primary antibody solution—CX26 or CX30 (mouse IgG, 33-5800 or rabbit IgG,  
181 71-2200, respectively, Life Technologies)—for 1 h after blocking. The secondary  
182 antibodies were Alexa Fluor 594–conjugated anti-mouse IgG (Invitrogen, A11032),  
183 Alexa Fluor 488–conjugated anti-rabbit IgG (Invitrogen, A11070), and phalloidin FITC  
184 (Invitrogen, A12379). Samples were washed twice with 0.01 M PBS and mounted with  
185 mounting medium (VECTASHIELD Mounting Medium with DAPI, Vector).

186 Fluorescence confocal images were obtained with an LSM510-META confocal  
187 microscope (Zeiss). Z-stacks of images were collected at 0.5  $\mu\text{m}$  intervals, and the  
188 single-image stacks were constructed using LSM Image Browser (Zeiss).  
189 Three-dimensional images were constructed with z-stacked confocal images using  
190 IMARIS (Bitplane).

191

## 192 **Statistical analyses**

193 The data were analyzed using Microsoft Excel software and are presented as the mean  $\pm$   
194 standard error. A two-tailed Student's *t*-test, with a significance criterion of  $p < 0.05$ ,  
195 was used to compare the GJP lengths. One-way ANOVA and multiple comparison test,  
196 with a significance criterion of  $p < 0.05$ , was used to compare *Gjb2* and *Gjb6* mRNA  
197 levels and the number of CX26+ vesicles.

198

## 199 **Results**

### 200 **SB431542, an inhibitor of TGF- $\beta$ signaling, promoted** 201 **BMP4-induced *Gjb2/Gjb6* mRNA expression in SFEBq** 202 **culture**

203 CX26GJCs were induced from mouse ESCs using previously reported  
204 method[26], and the conditions required for differentiation were then assessed. ESCs  
205 were cultured in SFEBq medium containing BMP4, SB, or BMP4 plus SB. Aggregates  
206 were collected on day 7 and mRNA (*Gjb2* and *Gjb6*) levels in the different culture  
207 groups were measured. BMP4 and BMP4/SB treatments produced more *Gjb2/Gjb6*  
208 mRNA than SB and control cultures (Fig 1B). BMP4 is a factor that induces *Gjb2/Gjb6*  
209 mRNA expression during iPSC differentiation[26]. In addition, ESCs cultured in  
210 differentiation medium supplemented with BMP4 and SB showed greater expression  
211 levels of mRNA (*Gjb2*, 1.8-fold greater; *Gjb6*, 1.7-fold greater) compared with the  
212 BMP4 alone group.

213

### 214 **SB431542 promoted formation of CX26-expressing small** 215 **vesicles in SFEBq culture**

216 By day 7 of differentiation, the aggregates showed differentiated outer regions

217 with a morphology similar to that reported previously[26]. Clear outer epithelia and  
218 small vesicles were observed beneath the outer epithelium of BMP4/SB-treated cells.  
219 By contrast, no small vesicles were observed for the control or SB-treated cells (Fig 2A,  
220 left column). To determine the location of CX26 in the cell aggregates,  
221 immunohistochemistry was performed. In BMP4 or BMP4/SB-treated aggregates, small  
222 vesicles containing CX26-GJP (hereafter called CX26+ vesicles) were observed (Fig  
223 2A, right column). The aggregates were collected, and the numbers of CX26+ vesicles  
224 were compared among the different treatment groups (Fig 2B).

225

226 **Fig 2. Stereomicroscopic images and immunostained aggregates derived from**  
227 **ESCs present on day 7. (A):** Left column: stereomicroscopic images of cells on day 7.  
228 Middle column: F-actin immunostained cells (green). Right column: magnification of  
229 boxed regions in the middle columns. Immunostained for CX26 (red). Arrowheads  
230 point to CX26+ vesicles. Scale bars, 200  $\mu\text{m}$  (left column); 100  $\mu\text{m}$  (middle column); 20  
231  $\mu\text{m}$  (right column). **(B):** The average number of CX26+ vesicles per aggregate from  
232 SB-, BMP4-, and BMP4/SB-treated, and untreated control cultures (n = 24 aggregates.  
233 For assessments, the procedures were repeated three times to generate cells. Statistical

234 differences between samples were assessed by One-way ANOVA and multiple  
235 comparison test; \*\*,  $p < 0.01$ . The data are expressed as mean  $\pm$  standard error.

236

237 Cells treated with BMP4/SB had more CX26+ vesicles (mean =  $5.08 \pm 0.28$ )  
238 than cells cultured only with BMP4 (mean =  $1.6 \pm 0.16$ ). CX26+ vesicles were found to  
239 exist separately from the BMP4/SB-treated aggregates (Fig 3A and 3B), suggesting that  
240 they could be easily isolated. Numerous CX26+ vesicles were mechanically collected as  
241 a purified CX26GJC population (Fig 3C).

242

243 **Fig 3. CX26+ vesicles in aggregates with BMP4 and SB supplementation. (A):**  
244 Merged images of CX26-immunostained (red) and phase-contrast microscopy-imaged  
245 (PCM, white) ESC aggregates at day 7. Arrows point to CX26+ vesicles containing  
246 CX26GJCs. The scale bar represents 50  $\mu\text{m}$ . **(B-C):** Stereomicroscopic (SM) images of  
247 isolated CX26+ vesicles from ESC aggregates at day 7. Arrowheads point to CX26+  
248 vesicles. CX26+ vesicles were easily isolated from semi-dissected ESC aggregates **(B)**  
249 and then mechanically collected **(C)**.

250

251 In the confocal analysis of the BMP4/SB-treated day-7 aggregates,



252 CX26-expressing cells were disseminated throughout the numerous CX26+ vesicles  
253 (Fig 4A and S1 Video). These cells formed CX26-positive GJs at their cell-cell borders  
254 (Fig 4B). In the 3D construction of the confocal images, we observed large planar  
255 CX26-containing GJPs (Fig 4C and S2 Video) which, as we reported previously[24,  
256 26], are characteristic of mouse cochlea.

257

258 **Fig 4. Confocal images of CX26+ vesicles in BMP4/SB-treated ESC aggregates.**

259 **(A):** Merged image of CX26-immunostained (red) and DAPI-stained (blue) cells in  
260 CX26+ vesicles. (inset in A) Magnification of a CX26+ vesicle. **(B):** Merged images of  
261 CX26-immunostained (red) and F-actin stained (green) cells in the same region as in  
262 **(A)**. Arrows point to GJPs. **(C):** The 3D image was reconstructed from the same region  
263 as shown in (inset in A, B). Scale bars: 50  $\mu\text{m}$  (A), 10  $\mu\text{m}$ : (inset in A, B, and C).

264

265 **ESC-derived CX26GJC co-expressed CX30 in adherent**  
266 **cultures formed GJPs**

267 Between day 7 and 9, BMP4/SB-treated aggregates were transferred onto  
268 cochlear-derived feeder cells, namely trypsin-resistant inner-ear cells (TRICs), as  
269 follows. The differentiated regions with CX26+ vesicles were separated from the day 7

270 aggregates and subcultured in Dulbecco's modified Eagle's medium (DMEM)  
271 GlutaMAX, 10% (v/v) fetal bovine serum (FBS) on TRIC feeder cells. The subcultured  
272 regions containing CX26+ vesicles colonized the TRIC feeder cells. In the adherent  
273 culture at day 15, CX26-containing GJPs were preserved (Fig 5A–C), as found in  
274 cochlear supporting cells. The mean length of the longest dimension of the GJPs along a  
275 single cell border was  $1.91 \pm 0.11 \mu\text{m}$  for BMP4/SB-treated aggregates, which was  
276 significantly increased to  $5.39 \pm 0.25 \mu\text{m}$  in the adherent culture on TRIC feeder cells  
277 (Fig 5D). To assess the similarities between these cells and cochlear cells, we  
278 characterized the expression of CX30, which is frequently absent in hereditary deafness.  
279 CX30 co-localized with CX26 in most CX26-GJPs in the differentiated cells (Fig 5E–  
280 H), suggesting that CX26 and CX30 were the two main components of these GJPs, as  
281 was found for cochlear cells[26].

282

283 **Fig 5. ESC-derived CX26GJC formed large CX26GJPs and**  
284 **CX26/CX30-containing GJPs. (A):** Merged images of CX26-immunostained (red) and  
285 DAPI-stained (blue) cells from an adherent culture at day 15. **(B):** Magnification of the  
286 boxed region in **(A)**. Arrows point to GJPs. **(C):** The 3D image was reconstructed from  
287 the same region as shown in **(B)**. **(D):** Mean lengths of the longest dimension of the

288 GJPs along a single cell border in SFEBq culture (3D) at day 7 and adherent culture  
289 (2D) at day 15. (SFEBq culture, n = 43 cell borders from 5 aggregates; adherent culture,  
290 n = 41 cell borders from 4 wells. For assessments, the procedures were repeated three  
291 times to generate cells. Statistical differences between samples were assessed by  
292 Student's *t*-test, \*\*,  $p < 0.01$ . The data are expressed as mean  $\pm$  standard error. **(E):**  
293 Merged images of CX26-immunostained (red), CX30-immunostained (green), and  
294 DAPI-stained (blue) cells from the adherent culture at day 15. **(F-H):** Magnification of  
295 the boxed region in **(E)**. Staining for CX26 (red), CX30 (green), and DAPI (blue) was  
296 as in **(E)**. Arrows point to the large GJPs. Scale bars: 20  $\mu\text{m}$  (A and E), 10  $\mu\text{m}$  (F-H), 5  
297  $\mu\text{m}$  (B), and 3  $\mu\text{m}$  (C).

298

299 **The amount of mRNA expression and the number of CX26**  
300 **positive small vesicles were increased by SB431542 addition in**  
301 **a dose-dependent manner**

302 Finally, to produce a large number of CX26GJC in SFEBq culture, we  
303 examined whether the differentiation from ES cells to CX26GJC depends on the  
304 concentration of SB431542.

305 As a result of qRT-PCR analysis, in BMP4 and SB combination, 5  $\mu\text{M}$  and 10

306  $\mu\text{M}$ , SB-treated aggregates showed greater expression level of *Gjb2* mRNA (BMP4/SB  
307 5  $\mu\text{M}$ , 1.7-fold greater; BMP4/SB 10  $\mu\text{M}$ , 1.7-fold greater) compared with the  
308 BMP4/SB 1  $\mu\text{M}$ . The expression level of *Gjb6* did not differ depending on the  
309 concentration of SB (Fig 6A). In the SB alone group, there was no difference in the  
310 expression level of *Gjb2/Gjb6* depending on the concentration of SB (S1A Fig).  
311 Thereafter, we determined the number of CX26 positive vesicles in day 7 aggregates by  
312 immunohistochemistry. In BMP4 and SB combination, 5  $\mu\text{M}$  and 10  $\mu\text{M}$ , SB-treated  
313 aggregates showed greater numbers of CX26+ vesicles (BMP4/SB 5 $\mu\text{M}$ , 1.5-fold  
314 greater; BMP4/SB 10 $\mu\text{M}$ , 1.3-fold greater) compared with the BMP4/SB 1 $\mu\text{M}$  (Fig 6B).  
315 Conversely, in the SB alone group, there was no difference in the number of small  
316 vesicles depending on the concentration of SB (S1B Fig).

317

318 **Fig 6. Dose-dependent manner of SB concentration in SFEBq culture expression**  
319 **level of mRNA and the number of CX26 + vesicles.**

320 **(A):** Relative expression of mRNA at day 7 for BMP4-treated (SB 0  $\mu\text{M}$  + BMP4 10  
321 ng/ml), and BMP4/SB (SB 1–10  $\mu\text{M}$  + BMP4 10 ng/ml) treated aggregates. The mRNA  
322 expression levels were normalized to those of BMP4/SB 1  $\mu\text{M}$  (SB 1  $\mu\text{M}$  + BMP4 10  
323 ng/ml) culture on day 7. (qRT-PCR, n = 5). For assessments, the procedures were

324 repeated five times to generate cells. Each experiment used 8 aggregates. Differences  
325 between samples were assessed by the Scheffe multiple comparison test; \*\*,  $p < 0.01$ .  
326 The data are expressed as mean  $\pm$  standard error. **(B)**: The average number of CX26+  
327 vesicles per aggregate from BMP4-treated (SB 0  $\mu$ M + BMP4 10 ng/ml), and BMP4/SB  
328 (SB 1–10  $\mu$ M + BMP4 10 ng/ml) treated aggregates. (n = 9 aggregates). For  
329 assessments, the procedures were repeated three times to generate cells. Statistical  
330 differences between samples were assessed by One-way ANOVA and multiple  
331 comparison test: \*,  $p < 0.05$ ; \*\*,  $p < 0.01$ . The data are expressed as mean  $\pm$  standard  
332 error.  
333

## 335 **Discussion**

336       Several previous studies have reported BMP4 signaling-induced stem cell  
337 differentiation[29, 51-53], differentiation into CX43-expressing cells as  
338 cardiomyocytes[64], and CX43 expression in mouse embryonal cells[54-56, 65].  
339 Although SB is reportedly involved in stem cell differentiation[29, 58-60, 66], it has not  
340 been shown to promote CX expression or GJ formation during stem cell differentiation  
341 or in mature cells. For the large-scale production of CX26GJCs, we evaluated the  
342 necessary conditions for the differentiation of pluripotent stem cells using modified  
343 SFEBq culture containing BMP4 and/or SB with ESC, which has a more stable  
344 differentiation potential than iPSCs.

345       We found that BMP4/SB treatment resulted in significantly greater production of  
346 CX26+ vesicles (Fig 2A and 2B) and significantly greater amount of *Gjb2* and *Gjb6*  
347 mRNAs (Fig 1B) than treatment with only BMP4 (Fig 7). Thus, these results suggest  
348 that the increase in CX26+ vesicles is because of the upregulation of mRNA (*Gjb2* and  
349 *Gjb6*) and SB strongly promoted BMP4-mediated differentiation of CX26GJCs (Fig 7).

350

351 **Fig 7. A schematic illustration of the effect of SB431542 on CX26 GJ formation in**  
352 **BMP4-induced ESC differentiation.**

353 In the BMP4-based inner-ear 3D differentiation from ESCs, SB431542 supplementation  
354 was associated with significantly higher mRNA levels of *Gjb2* (CX26) and *Gjb6*  
355 (CX30) and CX26<sup>+</sup> vesicle counts than under SB431542 absent condition. SB431542  
356 was demonstrated to be an accelerator of gap junction formation.

357

358 In the adherent culture that included TRIC feeder cells, we observed proliferation  
359 of CX26GJCs (Fig 5A) and long CX26-containing GJPs (Fig 5D), similar to  
360 observations when iPSCs were used[26]. Because the differentiated, aggregated cells  
361 co-expressed CX30 and CX26 (Fig 5E–H), it is likely that some cells were cochlear  
362 non-sensory cells containing CX26/CX30 GJPs that proliferated on the cochlear feeder  
363 cells after isolation of CX26<sup>+</sup> vesicles.

364 When BMP4 was present in the SFEBq culture, the addition of SB appeared to  
365 promote BMP4-mediated formation of CX26<sup>+</sup> vesicles. After transferring the CX26<sup>+</sup>  
366 vesicles onto cochlear feeder cells, the lengths of the GJPs of the proliferated  
367 CX26-expressing cells increased and the GJPs were observed to contain CX26/CX30.  
368 These results indicate that the number of CX26GJCs increased in adherent culture due  
369 to the increase in CX26<sup>+</sup> vesicles by SB treatment. Therefore, we suggest that SB  
370 promotes BMP4-mediated formation of CX26<sup>+</sup> vesicles in SFEBq culture. Mechanical

371 dissection of the aggregates (Fig 3B and 3C) suggested that CX26+ vesicles could be  
372 easily purified and isolated for large-scale production of CX26GJCs after adherent  
373 culture on feeder cells (Fig 5).

374 Furthermore, in the combination of BMP4/SB in SFEBq culture, increases in  
375 mRNA expression and CX26 positive small vesicles were found to depend on the  
376 concentration of SB. However, in the expression level of *Gjb2* and the number of CX26  
377 positive vesicles, there was no significant difference between 5  $\mu$ M and 10  $\mu$ M SB  
378 addition (Fig 6). These results indicated that CX26GJCs could be most efficiently  
379 induced in the BMP4/SB 5  $\mu$ M combination.

380 These data suggest that SB promotes BMP4-mediated production of CX26+  
381 vesicles in a dose-dependent manner, thereby increasing the yield of highly purified  
382 CX26GJCs.

383 This is the first study to show that SB431542 accelerates BMP4-induced GJ  
384 formation during *in vitro* differentiation of ESCs (Fig 7).

385 By controlling the timing and concentration of SB with CX26+ vesicle  
386 purification, large-scale production of highly purified CX26GJCs for high-throughput  
387 screening of drugs that target *GJB2*-related deafness should be possible.



## 388 **Funding**

389           This work was supported by grants from the JSPS KAKENHI (number  
390 17H04348, 16K15725 to K.Kamiya, and number 17K16948, 15K20229 to I.Fukunaga),  
391 Subsidies to Private Schools (to K.Kamiya and I.Fukunaga), Japan Agency for Medical  
392 Research and Development, (AMED, number 15ek0109125h0001, 19ae0101050h0002  
393 and 19ek0109401h0002 to K.Kamiya), and the Takeda Science Foundation (to  
394 K.Kamiya).

395

## 396 **Acknowledgments**

397           Kazusaku Kamiya: Conceptualization, Data Curation, Formal Analysis, Funding  
398 Acquisition, Investigation, Methodology, Project Administration, Resources,  
399 Supervision, Validation, Visualization, Writing – Original Draft Preparation, Writing –  
400 Review & Editing

401           Ichiro Fukunaga: Data Curation, Formal Analysis, Funding Acquisition,  
402 Investigation, Methodology, Resources, Validation, Visualization, Writing – Original  
403 Draft Preparation, Writing – Review & Editing

404           Cheng Chen, Yoko Oe, Keiko Danzaki, Sayaka Ohta, Akito Koike, Ayumi  
405 Fujimoto: Resources, Validation,

406 Katsuhisa Ikeda: Conceptualization, Resources

407

408

## 409 **Competing interests**

410 The authors declare no competing interests.

411

412

## 413 **References**

- 414 1. Chan DK, Schrijver I, Chang KW. Connexin-26-associated deafness: phenotypic  
415 variability and progression of hearing loss. *Genet Med.* 2010;12(3):174-81. doi:  
416 10.1097/GIM.0b013e3181d0d42b. PubMed PMID: 20154630.
- 417 2. Morton NE. Genetic epidemiology of hearing impairment. *Ann N Y Acad Sci.*  
418 1991;630:16-31. PubMed PMID: 1952587.
- 419 3. Petersen MB, Willems PJ. Non-syndromic, autosomal-recessive deafness. *Clin Genet.*  
420 2006;69(5):371-92. doi: 10.1111/j.1399-0004.2006.00613.x. PubMed PMID: 16650073.
- 421 4. Birkenhager R, Lublinghoff N, Prera E, Schild C, Aschendorff A, Arndt S. Autosomal  
422 dominant prelingual hearing loss with palmoplantar keratoderma syndrome: Variability in  
423 clinical expression from mutations of R75W and R75Q in the GJB2 gene. *Am J Med Genet A.*  
424 2010;152A(7):1798-802. doi: 10.1002/ajmg.a.33464. PubMed PMID: 20583176.
- 425 5. Morton CC, Nance WE. Newborn hearing screening--a silent revolution. *N Engl J*  
426 *Med.* 2006;354(20):2151-64. doi: 10.1056/NEJMra050700. PubMed PMID: 16707752.
- 427 6. Rabionet R, Zelante L, Lopez-Bigas N, D'Agruma L, Melchionda S, Restagno G, et al.  
428 Molecular basis of childhood deafness resulting from mutations in the GJB2 (connexin 26) gene.  
429 *Hum Genet.* 2000;106(1):40-4. PubMed PMID: 10982180.
- 430 7. Ahmad S, Chen S, Sun J, Lin X. Connexins 26 and 30 are co-assembled to form gap  
431 junctions in the cochlea of mice. *Biochem Biophys Res Commun.* 2003;307(2):362-8. PubMed  
432 PMID: 12859965.
- 433 8. Forge A, Becker D, Casalotti S, Edwards J, Marziano N, Nevill G. Gap junctions in the  
434 inner ear: comparison of distribution patterns in different vertebrates and assesment of  
435 connexin composition in mammals. *J Comp Neurol.* 2003;467(2):207-31. doi:  
436 10.1002/cne.10916. PubMed PMID: 14595769.
- 437 9. Kikuchi T, Kimura RS, Paul DL, Adams JC. Gap junctions in the rat cochlea:  
438 immunohistochemical and ultrastructural analysis. *Anat Embryol (Berl).* 1995;191(2):101-18.  
439 PubMed PMID: 7726389.
- 440 10. Liu YP, Zhao HB. Cellular characterization of Connexin26 and Connexin30  
441 expression in the cochlear lateral wall. *Cell Tissue Res.* 2008;333(3):395-403. doi:  
442 10.1007/s00441-008-0641-5. PubMed PMID: 18581144; PubMed Central PMCID:  
443 PMCPMC2548271.
- 444 11. Zhao HB, Yu N. Distinct and gradient distributions of connexin26 and connexin30 in  
445 the cochlear sensory epithelium of guinea pigs. *J Comp Neurol.* 2006;499(3):506-18. doi:  
446 10.1002/cne.21113. PubMed PMID: 16998915; PubMed Central PMCID: PMCPMC2553046.
- 447 12. Wingard JC, Zhao HB. Cellular and Deafness Mechanisms Underlying Connexin

- 448 Mutation-Induced Hearing Loss - A Common Hereditary Deafness. *Front Cell Neurosci.*  
449 2015;9:202. doi: 10.3389/fncel.2015.00202. PubMed PMID: 26074771; PubMed Central  
450 PMCID: PMC4448512.
- 451 13. Zhao HB, Santos-Sacchi J. Auditory collusion and a coupled couple of outer hair cells.  
452 *Nature.* 1999;399(6734):359-62. doi: 10.1038/20686. PubMed PMID: 10360573.
- 453 14. Sun J, Ahmad S, Chen S, Tang W, Zhang Y, Chen P, et al. Cochlear gap junctions  
454 coassembled from Cx26 and 30 show faster intercellular Ca<sup>2+</sup> signaling than homomeric  
455 counterparts. *Am J Physiol Cell Physiol.* 2005;288(3):C613-23. doi: 10.1152/ajpcell.00341.2004.  
456 PubMed PMID: 15692151.
- 457 15. Yum SW, Zhang J, Valiunas V, Kanaporis G, Brink PR, White TW, et al. Human  
458 connexin26 and connexin30 form functional heteromeric and heterotypic channels. *Am J Physiol*  
459 *Cell Physiol.* 2007;293(3):C1032-48. doi: 10.1152/ajpcell.00011.2007. PubMed PMID:  
460 17615163.
- 461 16. Koval M. Pathways and control of connexin oligomerization. *Trends Cell Biol.*  
462 2006;16(3):159-66. doi: 10.1016/j.tcb.2006.01.006. PubMed PMID: 16490353.
- 463 17. Kikuchi T, Kimura RS, Paul DL, Takasaka T, Adams JC. Gap junction systems in the  
464 mammalian cochlea. *Brain Res Brain Res Rev.* 2000;32(1):163-6. PubMed PMID: 10751665.
- 465 18. Inoshita A, Iizuka T, Okamura HO, Minekawa A, Kojima K, Furukawa M, et al.  
466 Postnatal development of the organ of Corti in dominant-negative Gjb2 transgenic mice.  
467 *Neuroscience.* 2008;156(4):1039-47. doi: 10.1016/j.neuroscience.2008.08.027. PubMed PMID:  
468 18793701.
- 469 19. Cohen-Salmon M, Ott T, Michel V, Hardelin JP, Perfettini I, Eybalin M, et al.  
470 Targeted ablation of connexin26 in the inner ear epithelial gap junction network causes hearing  
471 impairment and cell death. *Curr Biol.* 2002;12(13):1106-11. PubMed PMID: 12121617;  
472 PubMed Central PMCID: PMC4030438.
- 473 20. Chen J, Chen J, Zhu Y, Liang C, Zhao HB. Deafness induced by Connexin 26 (GJB2)  
474 deficiency is not determined by endocochlear potential (EP) reduction but is associated with  
475 cochlear developmental disorders. *Biochem Biophys Res Commun.* 2014;448(1):28-32. doi:  
476 10.1016/j.bbrc.2014.04.016. PubMed PMID: 24732355; PubMed Central PMCID:  
477 PMC4105360.
- 478 21. Chen S, Sun Y, Lin X, Kong W. Down regulated connexin26 at different postnatal stage  
479 displayed different types of cellular degeneration and formation of organ of Corti. *Biochem*  
480 *Biophys Res Commun.* 2014;445(1):71-7. doi: 10.1016/j.bbrc.2014.01.154. PubMed PMID:  
481 24491564.
- 482 22. Wang Y, Chang Q, Tang W, Sun Y, Zhou B, Li H, et al. Targeted connexin26 ablation  
483 arrests postnatal development of the organ of Corti. *Biochem Biophys Res Commun.*

- 484 2009;385(1):33-7. doi: 10.1016/j.bbrc.2009.05.023. PubMed PMID: 19433060; PubMed  
485 Central PMCID: PMCPMC2713729.
- 486 23. Anzai T, Fukunaga I, Hatakeyama K, Fujimoto A, Kobayashi K, Nishikawa A, et al.  
487 Deformation of the Outer Hair Cells and the Accumulation of Caveolin-2 in Connexin 26  
488 Deficient Mice. *PLoS One*. 2015;10(10):e0141258. doi: 10.1371/journal.pone.0141258.  
489 PubMed PMID: 26492081; PubMed Central PMCID: PMCPMC4619622.
- 490 24. Kamiya K, Yum SW, Kurebayashi N, Muraki M, Ogawa K, Karasawa K, et al. Assembly  
491 of the cochlear gap junction macromolecular complex requires connexin 26. *J Clin Invest*.  
492 2014;124(4):1598-607. doi: 10.1172/JCI67621. PubMed PMID: 24590285; PubMed Central  
493 PMCID: PMCPMC3973107.
- 494 25. Iizuka T, Kamiya K, Gotoh S, Sugitani Y, Suzuki M, Noda T, et al. Perinatal Gjb2 gene  
495 transfer rescues hearing in a mouse model of hereditary deafness. *Hum Mol Genet*.  
496 2015;24(13):3651-61. doi: 10.1093/hmg/ddv109. PubMed PMID: 25801282.
- 497 26. Fukunaga I, Fujimoto A, Hatakeyama K, Aoki T, Nishikawa A, Noda T, et al. In Vitro  
498 Models of GJB2-Related Hearing Loss Recapitulate Ca<sup>2+</sup> Transients via a Gap Junction  
499 Characteristic of Developing Cochlea. *Stem Cell Reports*. 2016;7(6):1023-36. doi:  
500 10.1016/j.stemcr.2016.10.005. PubMed PMID: 27840044; PubMed Central PMCID:  
501 PMCPMC5161531.
- 502 27. Oshima K, Shin K, Diensthuber M, Peng AW, Ricci AJ, Heller S. Mechanosensitive  
503 hair cell-like cells from embryonic and induced pluripotent stem cells. *Cell*. 2010;141(4):704-16.  
504 doi: 10.1016/j.cell.2010.03.035. PubMed PMID: 20478259; PubMed Central PMCID:  
505 PMCPMC2873974.
- 506 28. Chen W, Jongkamonwiwat N, Abbas L, Eshtan SJ, Johnson SL, Kuhn S, et al.  
507 Restoration of auditory evoked responses by human ES-cell-derived otic progenitors. *Nature*.  
508 2012;490(7419):278-82. doi: 10.1038/nature11415. PubMed PMID: 22972191; PubMed  
509 Central PMCID: PMCPMC3480718.
- 510 29. Koehler KR, Mikosz AM, Molosh AI, Patel D, Hashino E. Generation of inner ear  
511 sensory epithelia from pluripotent stem cells in 3D culture. *Nature*. 2013;500(7461):217-21. doi:  
512 10.1038/nature12298. PubMed PMID: 23842490; PubMed Central PMCID:  
513 PMCPMC3739998.
- 514 30. Ouji Y, Ishizaka S, Nakamura-Uchiyama F, Yoshikawa M. In vitro differentiation of  
515 mouse embryonic stem cells into inner ear hair cell-like cells using stromal cell conditioned  
516 medium. *Cell Death Dis*. 2012;3:e314. doi: 10.1038/cddis.2012.56. PubMed PMID: 22622133;  
517 PubMed Central PMCID: PMCPMC3366087.
- 518 31. Ronaghi M, Nasr M, Ealy M, Durruthy-Durruthy R, Waldhaus J, Diaz GH, et al. Inner  
519 ear hair cell-like cells from human embryonic stem cells. *Stem Cells Dev*. 2014;23(11):1275-84.

- 520 doi: 10.1089/scd.2014.0033. PubMed PMID: 24512547; PubMed Central PMCID:  
521 PMCPMC4028088.
- 522 32. Ohnishi H, Skerleva D, Kitajiri S, Sakamoto T, Yamamoto N, Ito J, et al. Limited hair  
523 cell induction from human induced pluripotent stem cells using a simple stepwise method.  
524 *Neurosci Lett.* 2015;599:49-54. doi: 10.1016/j.neulet.2015.05.032. PubMed PMID: 26003451.
- 525 33. Chen JR, Tang ZH, Zheng J, Shi HS, Ding J, Qian XD, et al. Effects of genetic  
526 correction on the differentiation of hair cell-like cells from iPSCs with MYO15A mutation. *Cell*  
527 *Death Differ.* 2016;23(8):1347-57. doi: 10.1038/cdd.2016.16. PubMed PMID: 26915297;  
528 PubMed Central PMCID: PMCPMC4947666.
- 529 34. Ding J, Tang Z, Chen J, Shi H, Chen J, Wang C, et al. Induction of differentiation of  
530 human embryonic stem cells into functional hair-cell-like cells in the absence of stromal cells. *Int*  
531 *J Biochem Cell Biol.* 2016;81(Pt A):208-22. doi: 10.1016/j.biocel.2015.11.012. PubMed PMID:  
532 26615761.
- 533 35. Longworth-Mills E, Koehler KR, Hashino E. Generating Inner Ear Organoids from  
534 Mouse Embryonic Stem Cells. *Methods Mol Biol.* 2016;1341:391-406. doi:  
535 10.1007/7651\_2015\_215. PubMed PMID: 25822723.
- 536 36. Tang ZH, Chen JR, Zheng J, Shi HS, Ding J, Qian XD, et al. Genetic Correction of  
537 Induced Pluripotent Stem Cells From a Deaf Patient With MYO7A Mutation Results in  
538 Morphologic and Functional Recovery of the Derived Hair Cell-Like Cells. *Stem Cells Transl*  
539 *Med.* 2016;5(5):561-71. doi: 10.5966/sctm.2015-0252. PubMed PMID: 27013738; PubMed  
540 Central PMCID: PMCPMC4835250.
- 541 37. Yoshikawa M, Oujii Y. Induction of Inner Ear Hair Cells from Mouse Embryonic Stem  
542 Cells In Vitro. *Methods Mol Biol.* 2016;1516:257-67. doi: 10.1007/7651\_2016\_328. PubMed  
543 PMID: 27032944.
- 544 38. Koehler KR, Nie J, Longworth-Mills E, Liu XP, Lee J, Holt JR, et al. Generation of  
545 inner ear organoids containing functional hair cells from human pluripotent stem cells. *Nat*  
546 *Biotechnol.* 2017;35(6):583-9. doi: 10.1038/nbt.3840. PubMed PMID: 28459451; PubMed  
547 Central PMCID: PMCPMC5462862.
- 548 39. Oujii Y, Sakagami M, Omori H, Higashiyama S, Kawai N, Kitahara T, et al. Efficient  
549 induction of inner ear hair cell-like cells from mouse ES cells using combination of Math1  
550 transfection and conditioned medium from ST2 stromal cells. *Stem Cell Res.* 2017;23:50-6. doi:  
551 10.1016/j.scr.2017.06.013. PubMed PMID: 28689068.
- 552 40. Eiraku M, Watanabe K, Matsuo-Takasaki M, Kawada M, Yonemura S, Matsumura M,  
553 et al. Self-organized formation of polarized cortical tissues from ESCs and its active manipulation  
554 by extrinsic signals. *Cell Stem Cell.* 2008;3(5):519-32. doi: 10.1016/j.stem.2008.09.002.  
555 PubMed PMID: 18983967.

- 556 41. Eiraku M, Takata N, Ishibashi H, Kawada M, Sakakura E, Okuda S, et al.  
557 Self-organizing optic-cup morphogenesis in three-dimensional culture. *Nature*.  
558 2011;472(7341):51-6. doi: 10.1038/nature09941. PubMed PMID: 21475194.
- 559 42. Danjo T, Eiraku M, Muguruma K, Watanabe K, Kawada M, Yanagawa Y, et al.  
560 Subregional specification of embryonic stem cell-derived ventral telencephalic tissues by timed  
561 and combinatory treatment with extrinsic signals. *J Neurosci*. 2011;31(5):1919-33. doi:  
562 10.1523/JNEUROSCI.5128-10.2011. PubMed PMID: 21289201.
- 563 43. Ikeda H, Osakada F, Watanabe K, Mizuseki K, Haraguchi T, Miyoshi H, et al.  
564 Generation of Rx+/Pax6+ neural retinal precursors from embryonic stem cells. *Proc Natl Acad*  
565 *Sci U S A*. 2005;102(32):11331-6. doi: 10.1073/pnas.0500010102. PubMed PMID: 16076961;  
566 PubMed Central PMCID: PMC1183536.
- 567 44. Nakano T, Ando S, Takata N, Kawada M, Muguruma K, Sekiguchi K, et al.  
568 Self-formation of optic cups and storable stratified neural retina from human ESCs. *Cell Stem*  
569 *Cell*. 2012;10(6):771-85. doi: 10.1016/j.stem.2012.05.009. PubMed PMID: 22704518.
- 570 45. Muguruma K, Nishiyama A, Ono Y, Miyawaki H, Mizuhara E, Hori S, et al.  
571 Ontogeny-recapitulating generation and tissue integration of ES cell-derived Purkinje cells. *Nat*  
572 *Neurosci*. 2010;13(10):1171-80. doi: 10.1038/nn.2638. PubMed PMID: 20835252.
- 573 46. Winnier G, Blessing M, Labosky PA, Hogan BL. Bone morphogenetic protein-4 is  
574 required for mesoderm formation and patterning in the mouse. *Genes Dev*. 1995;9(17):2105-16.  
575 PubMed PMID: 7657163.
- 576 47. Beppu H, Kawabata M, Hamamoto T, Chytil A, Minowa O, Noda T, et al. BMP type II  
577 receptor is required for gastrulation and early development of mouse embryos. *Dev Biol*.  
578 2000;221(1):249-58. doi: 10.1006/dbio.2000.9670. PubMed PMID: 10772805.
- 579 48. Mishina Y, Suzuki A, Ueno N, Behringer RR. Bmpr encodes a type I bone  
580 morphogenetic protein receptor that is essential for gastrulation during mouse embryogenesis.  
581 *Genes Dev*. 1995;9(24):3027-37. PubMed PMID: 8543149.
- 582 49. Wilson PA, Hemmati-Brivanlou A. Induction of epidermis and inhibition of neural fate  
583 by Bmp-4. *Nature*. 1995;376(6538):331-3. doi: 10.1038/376331a0. PubMed PMID: 7630398.
- 584 50. Grocott T, Tambalo M, Streit A. The peripheral sensory nervous system in the  
585 vertebrate head: a gene regulatory perspective. *Dev Biol*. 2012;370(1):3-23. doi:  
586 10.1016/j.ydbio.2012.06.028. PubMed PMID: 22790010.
- 587 51. Wiles MV, Johansson BM. Embryonic stem cell development in a chemically defined  
588 medium. *Exp Cell Res*. 1999;247(1):241-8. doi: 10.1006/excr.1998.4353. PubMed PMID:  
589 10047466.
- 590 52. Park C, Afrikanova I, Chung YS, Zhang WJ, Arentson E, Fong Gh G, et al. A  
591 hierarchical order of factors in the generation of FLK1- and SCL-expressing hematopoietic and

- 592 endothelial progenitors from embryonic stem cells. *Development*. 2004;131(11):2749-62. doi:  
593 10.1242/dev.01130. PubMed PMID: 15148304.
- 594 53. Czyz J, Wobus A. Embryonic stem cell differentiation: the role of extracellular factors.  
595 *Differentiation*. 2001;68(4-5):167-74. PubMed PMID: 11776469.
- 596 54. Schalper KA, Riquelme MA, Branes MC, Martinez AD, Vega JL, Berthoud VM, et al.  
597 Modulation of gap junction channels and hemichannels by growth factors. *Mol Biosyst*.  
598 2012;8(3):685-98. doi: 10.1039/c1mb05294b. PubMed PMID: 22218428.
- 599 55. Chang HM, Cheng JC, Leung PC. Theca-derived BMP4 and BMP7 down-regulate  
600 connexin43 expression and decrease gap junction intercellular communication activity in  
601 immortalized human granulosa cells. *J Clin Endocrinol Metab*. 2013;98(3):E437-45. doi:  
602 10.1210/jc.2012-3851. PubMed PMID: 23386650.
- 603 56. Boswell BA, Lein PJ, Musil LS. Cross-talk between fibroblast growth factor and bone  
604 morphogenetic proteins regulates gap junction-mediated intercellular communication in lens  
605 cells. *Mol Biol Cell*. 2008;19(6):2631-41. doi: 10.1091/mbc.E08-02-0124. PubMed PMID:  
606 18400943; PubMed Central PMCID: PMCPMC2397318.
- 607 57. Chambers SM, Fasano CA, Papapetrou EP, Tomishima M, Sadelain M, Studer L.  
608 Highly efficient neural conversion of human ES and iPS cells by dual inhibition of SMAD  
609 signaling. *Nat Biotechnol*. 2009;27(3):275-80. doi: 10.1038/nbt.1529. PubMed PMID:  
610 19252484; PubMed Central PMCID: PMCPMC2756723.
- 611 58. Chambers SM, Qi Y, Mica Y, Lee G, Zhang XJ, Niu L, et al. Combined small-molecule  
612 inhibition accelerates developmental timing and converts human pluripotent stem cells into  
613 nociceptors. *Nat Biotechnol*. 2012;30(7):715-20. doi: 10.1038/nbt.2249. PubMed PMID:  
614 22750882; PubMed Central PMCID: PMCPMC3516136.
- 615 59. Li W, Li K, Wei W, Ding S. Chemical approaches to stem cell biology and therapeutics.  
616 *Cell Stem Cell*. 2013;13(3):270-83. doi: 10.1016/j.stem.2013.08.002. PubMed PMID:  
617 24012368; PubMed Central PMCID: PMCPMC3898630.
- 618 60. Koehler KR, Hashino E. 3D mouse embryonic stem cell culture for generating inner ear  
619 organoids. *Nat Protoc*. 2014;9(6):1229-44. doi: 10.1038/nprot.2014.100. PubMed PMID:  
620 24784820.
- 621 61. Niwa H, Masui S, Chambers I, Smith AG, Miyazaki J. Phenotypic complementation  
622 establishes requirements for specific POU domain and generic transactivation function of  
623 Oct-3/4 in embryonic stem cells. *Mol Cell Biol*. 2002;22(5):1526-36. PubMed PMID: 11839818;  
624 PubMed Central PMCID: PMCPMC134688.
- 625 62. Ogawa K, Matsui H, Ohtsuka S, Niwa H. A novel mechanism for regulating clonal  
626 propagation of mouse ES cells. *Genes Cells*. 2004;9(5):471-7. doi:  
627 10.1111/j.1356-9597.2004.00736.x. PubMed PMID: 15147275.



- 628 63. Ying QL, Wray J, Nichols J, Batlle-Morera L, Doble B, Woodgett J, et al. The ground  
629 state of embryonic stem cell self-renewal. *Nature*. 2008;453(7194):519-23. doi:  
630 10.1038/nature06968. PubMed PMID: 18497825; PubMed Central PMCID:  
631 PMC5328678.
- 632 64. Takei S, Ichikawa H, Johkura K, Mogi A, No H, Yoshie S, et al. Bone morphogenetic  
633 protein-4 promotes induction of cardiomyocytes from human embryonic stem cells in  
634 serum-based embryoid body development. *Am J Physiol Heart Circ Physiol*.  
635 2009;296(6):H1793-803. doi: 10.1152/ajpheart.01288.2008. PubMed PMID: 19363129.
- 636 65. Bani-Yaghoub M, Felker JM, Sans C, Naus CC. The effects of bone morphogenetic  
637 protein 2 and 4 (BMP2 and BMP4) on gap junctions during neurodevelopment. *Exp Neurol*.  
638 2000;162(1):13-26. doi: 10.1006/exnr.2000.7294. PubMed PMID: 10716885.
- 639 66. Xu JG, Gong T, Wang YY, Zou T, Heng BC, Yang YQ, et al. Inhibition of TGF-beta  
640 Signaling in SHED Enhances Endothelial Differentiation. *J Dent Res*. 2018;97(2):218-25. doi:  
641 10.1177/0022034517733741. PubMed PMID: 28972822.

642

## 644 **Supporting information**

645

646 **S1 Fig. Effects of the addition of various concentrations of SB on the expression**

647 **level of mRNA and the number of CX26 + vesicles.** (A): Relative expression of

648 mRNA at day 7 for SB-treated (SB 1-10 $\mu$ M), and BMP4/SB (SB 1 $\mu$ M+BMP4 10ng/ml)

649 treated aggregates. The mRNA expression levels were normalized to that of BMP4/SB

650 1 $\mu$ M (SB 1 $\mu$ M+BMP4 10ng/ml) culture on day 7. (qRT-PCR: n = 5. For assessments,

651 five time procedures were repeated to generate cells. Each experiment with 8

652 aggregates.). Differences between samples were assessed by the Scheffe multiple

653 comparison test; \*\*, p < 0.01. The data are expressed as mean  $\pm$  standard error. (B): The

654 average number of CX26+ vesicles per aggregate from SB-treated (SB 1-10 $\mu$ M), and

655 BMP4/SB (SB 1 $\mu$ M+BMP4 10ng/ml) treated aggregates. (n = 9 aggregates. For

656 assessments, three time procedures were repeated to generate cells.). Statistical

657 differences between samples were assessed by the One-way ANOVA and multiple

658 comparison test: \*, p < 0.05; \*\*, p < 0.01. The data are expressed as mean  $\pm$  the

659 standard error.

660

661 **S1 Video. The three-dimensional (3D) image of whole CX26(+) vesicle in Day 7**

662 **aggregate.** The 3D image was reconstructed from consecutive slices of CX26(+)

663 vesicle in (Figure 4A). Confocal stacks of CX26 (red), F-actin (green), and DAPI (blue)

664 stain showing CX26-GJP-forming cells within the clear small vesicle.

665

666 **S2 Video. The three-dimensional (3D) image of CX26-GJP forming cells in**

667 **CX26(+) vesicle.** The 3D image was reconstructed from consecutive slices of (Figure

668 4B). Confocal stacks of CX26 (red), F-actin (green), and DAPI (blue) stain showing

669 that CX26 formed gap junction plaques at the cell-cell border.

670

**A**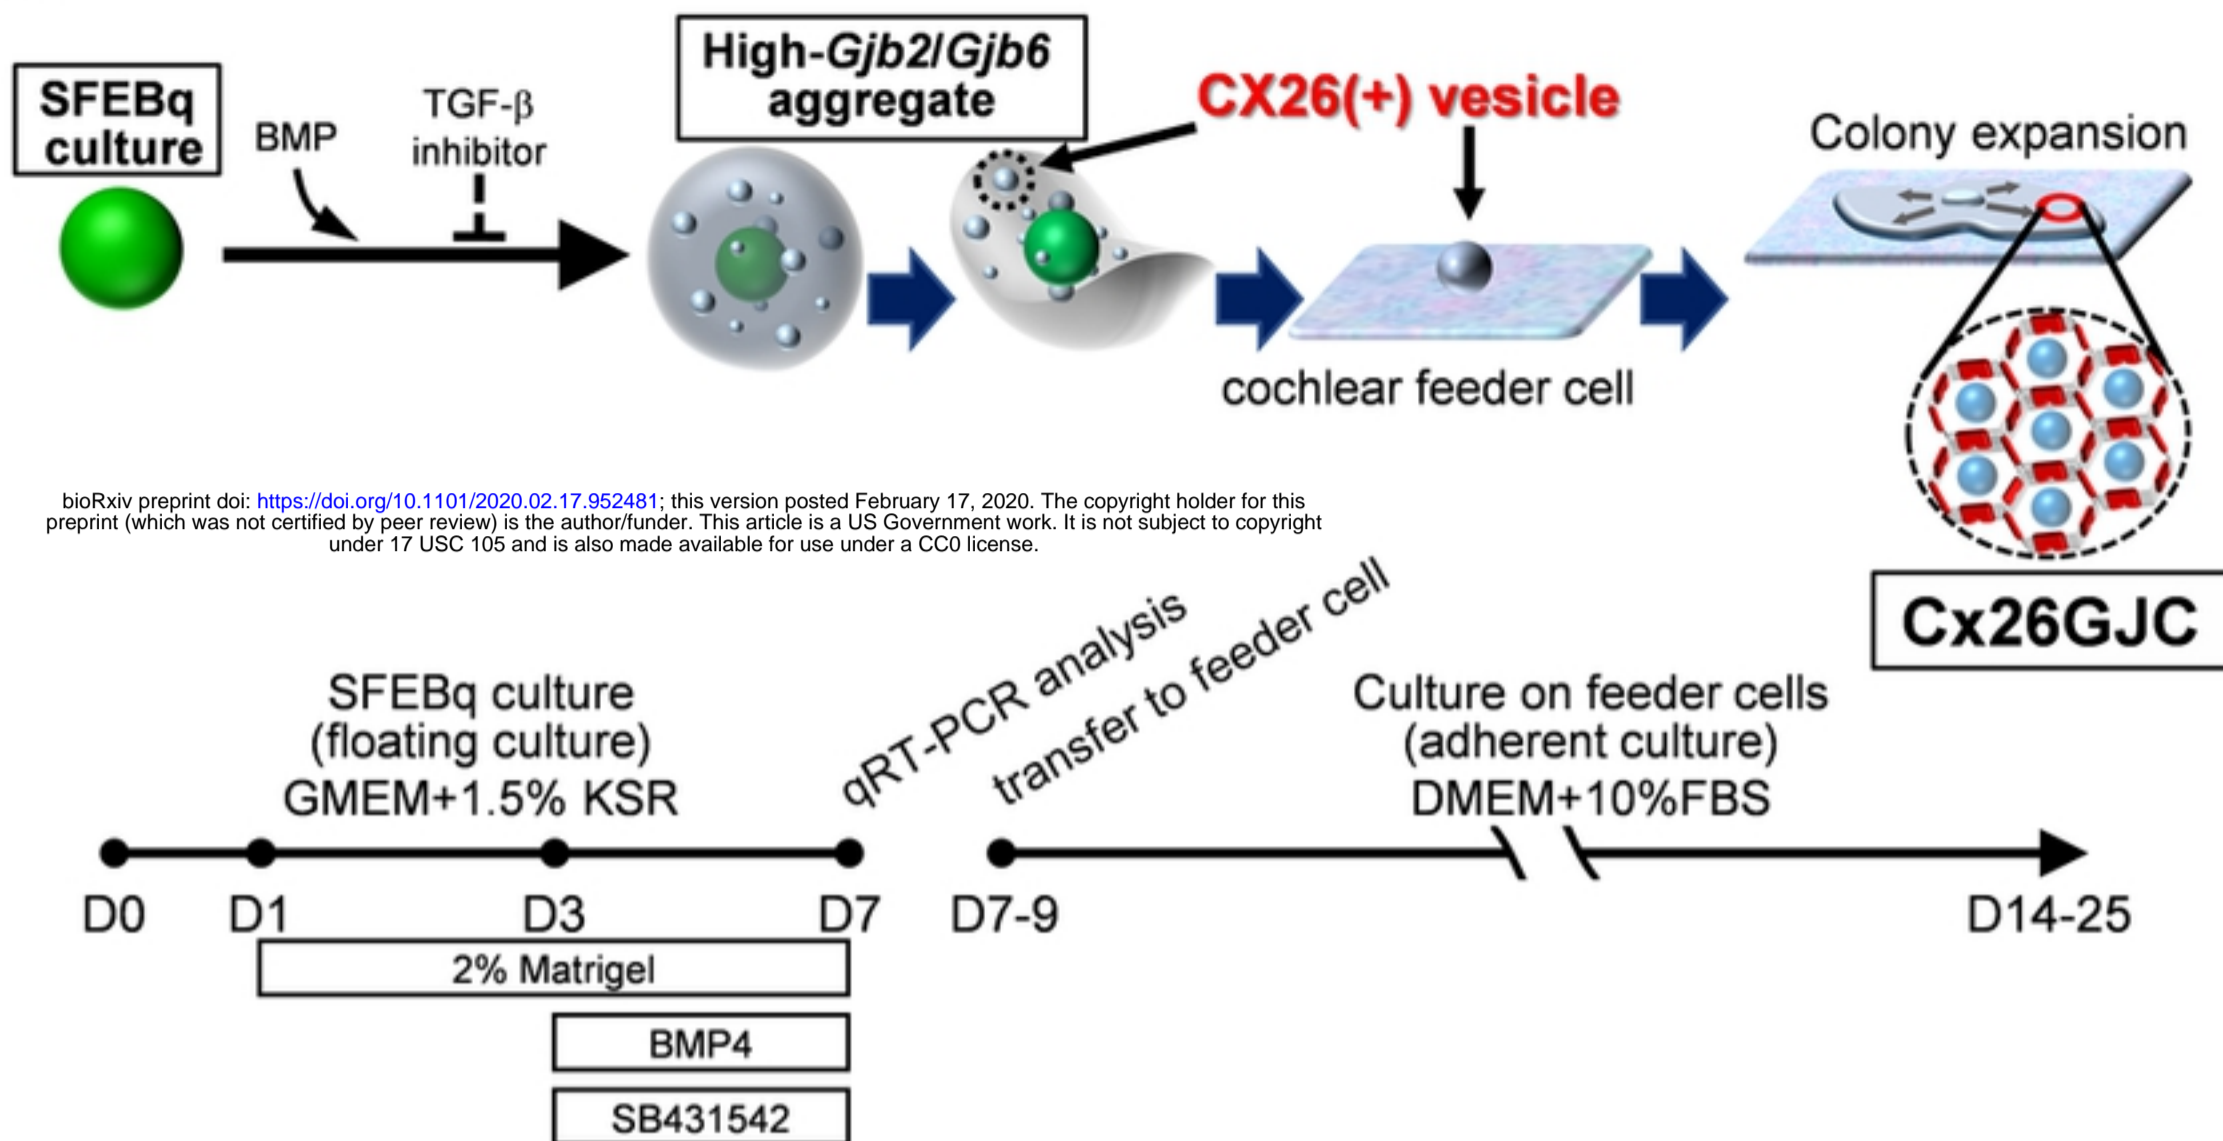**B**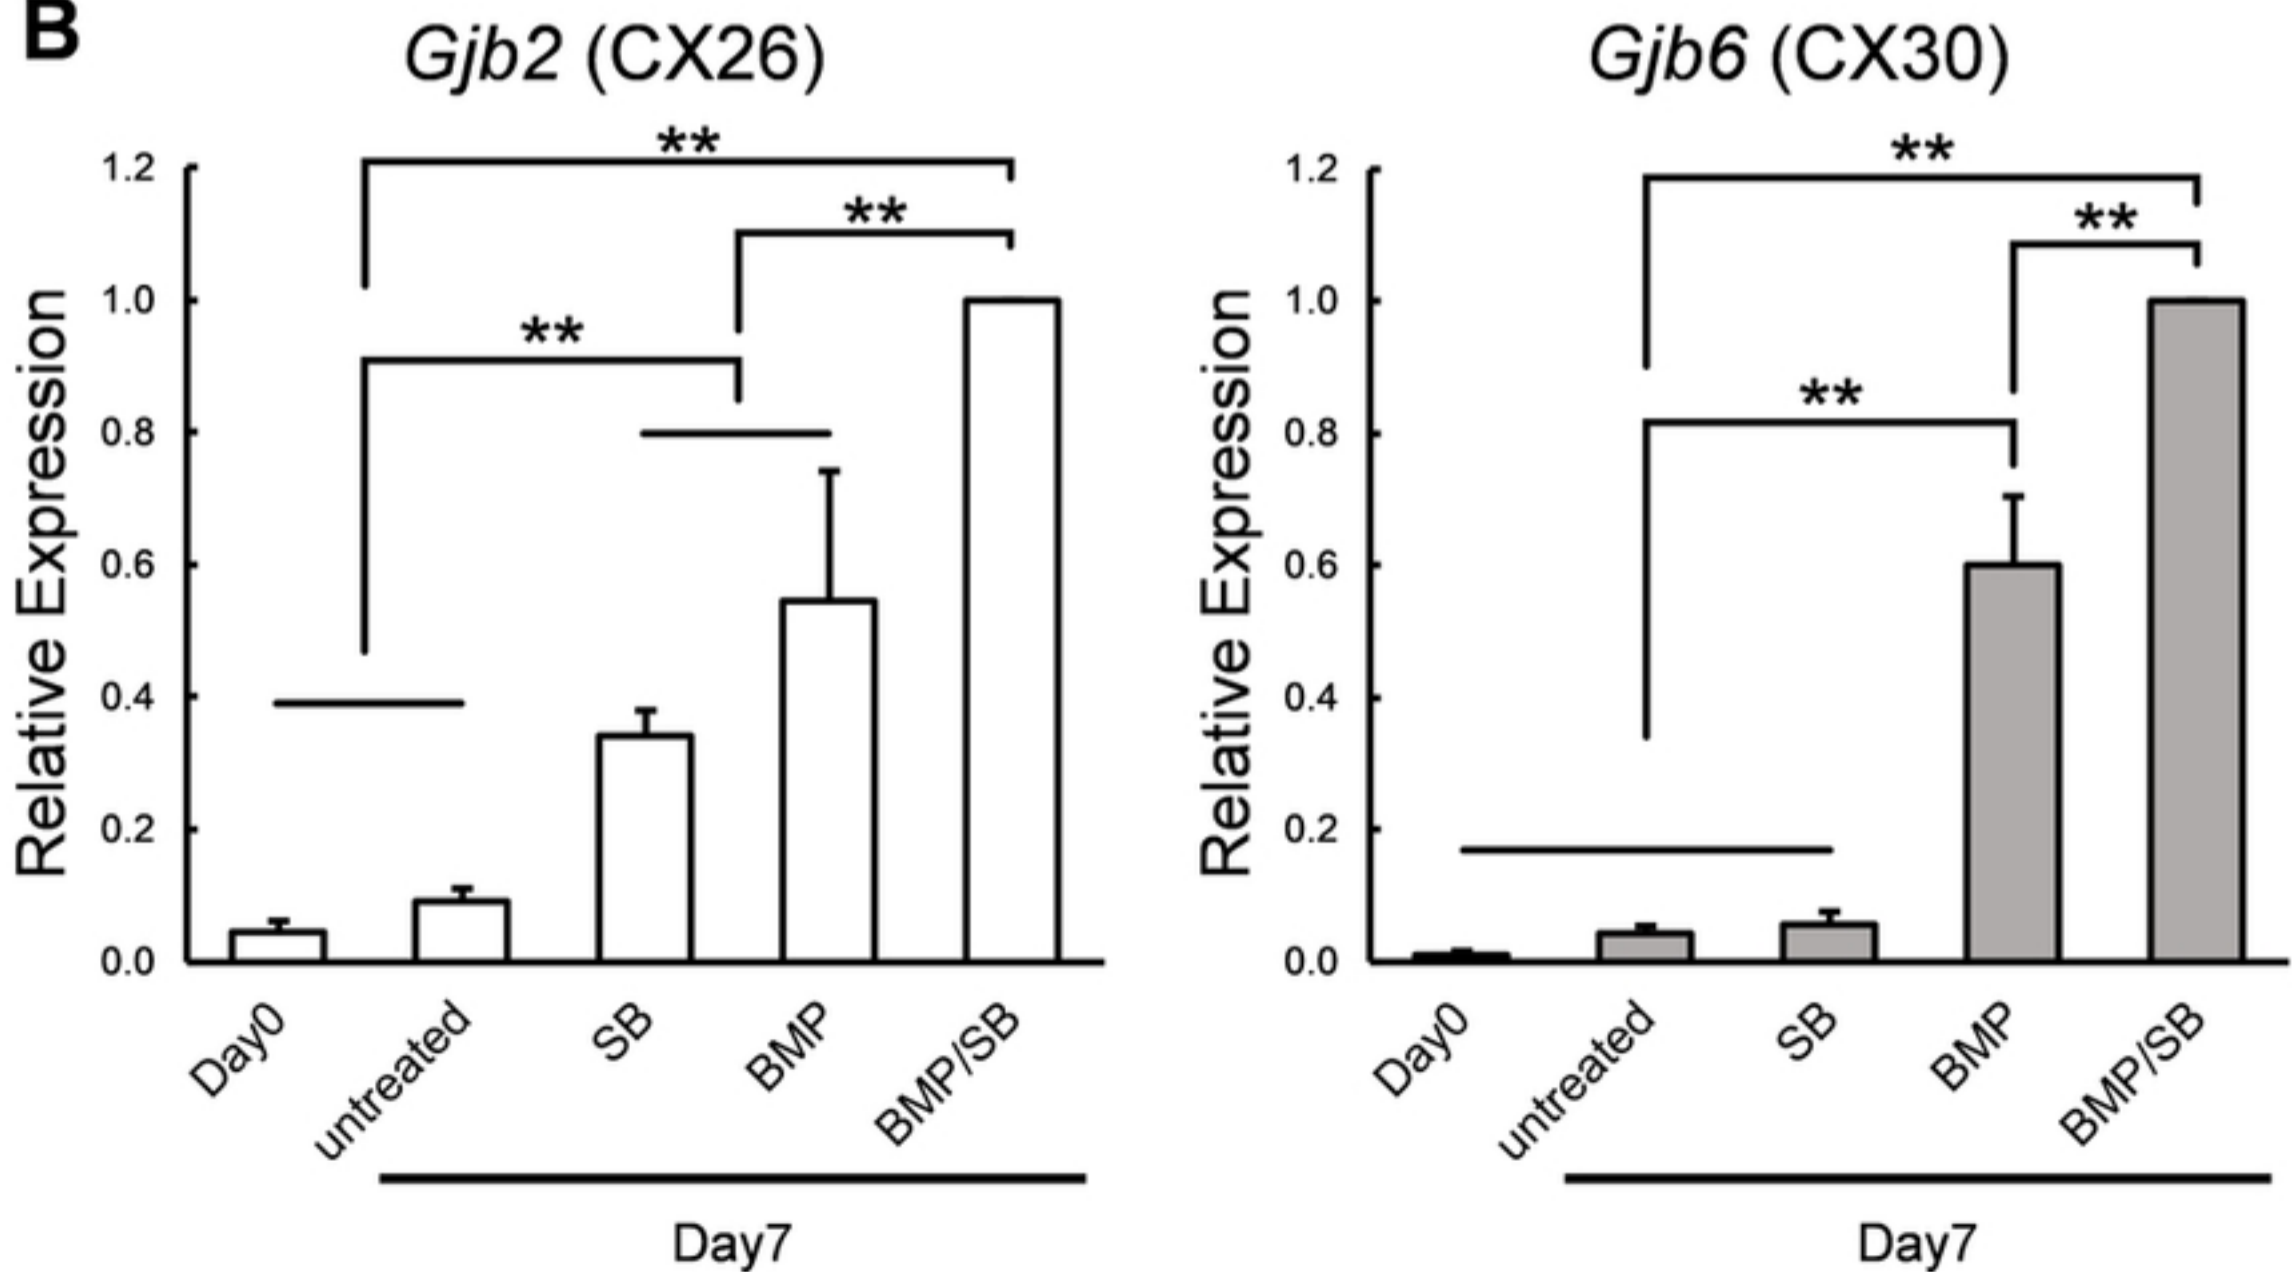

Fig1

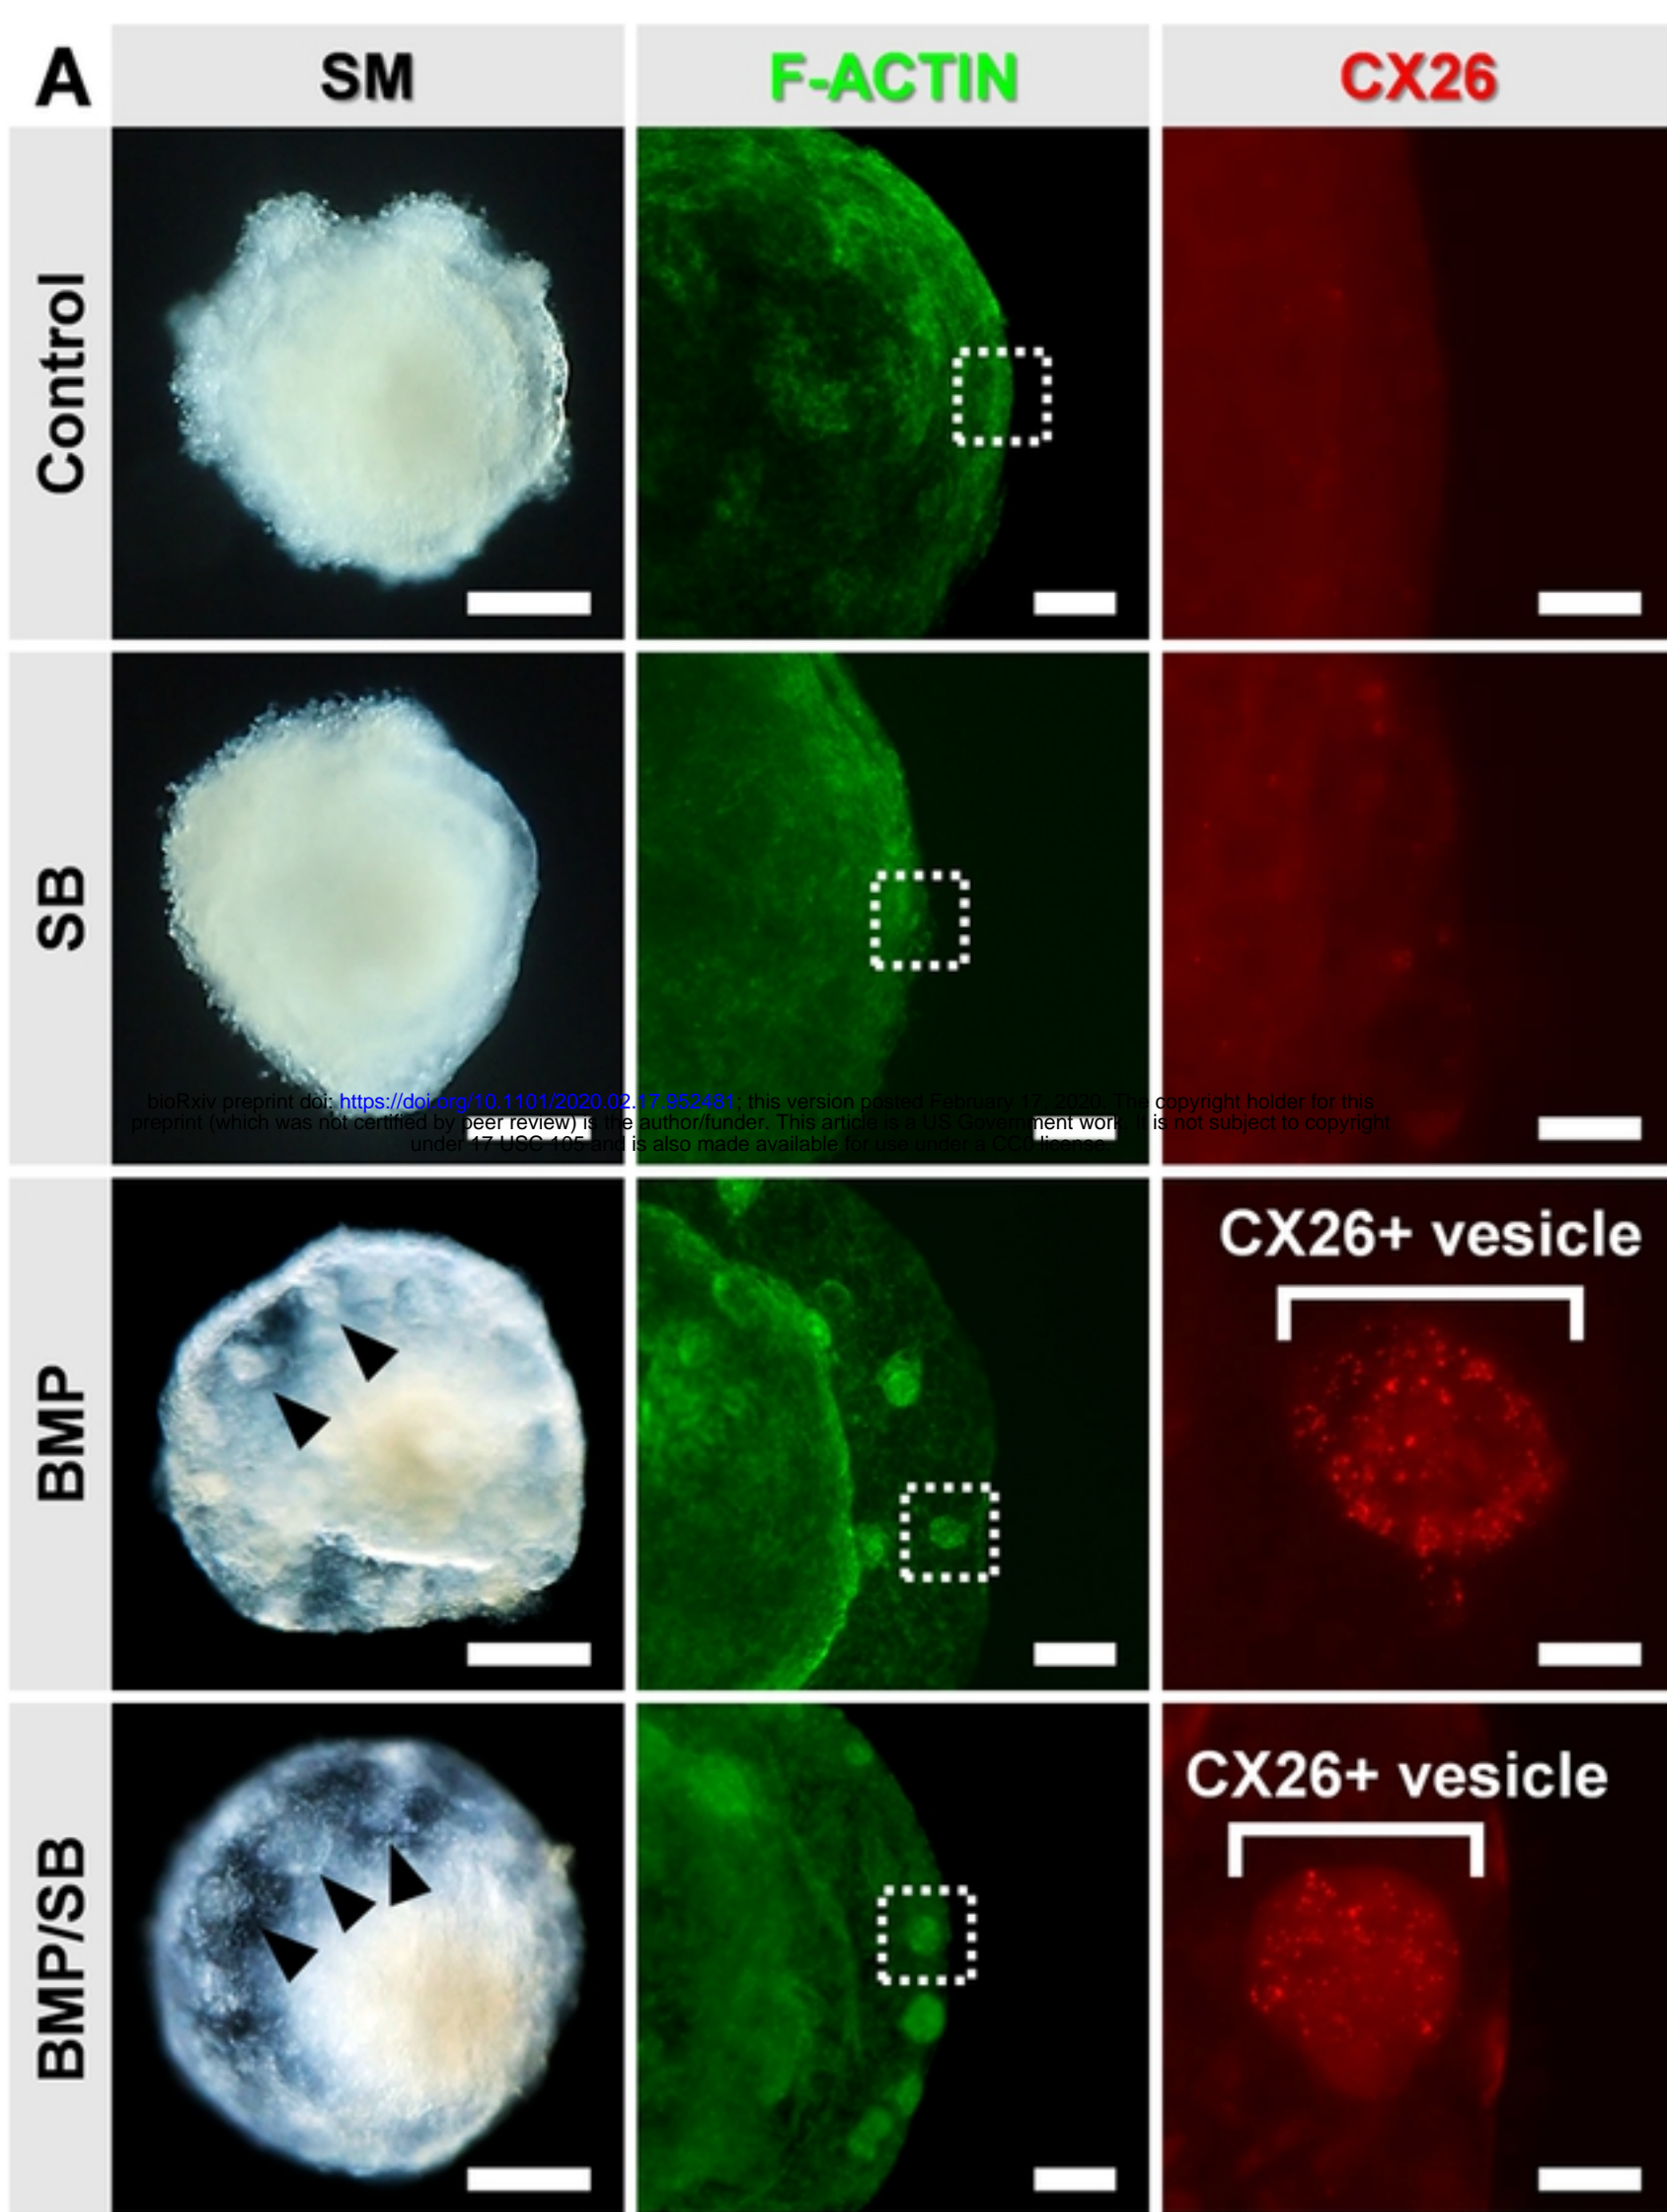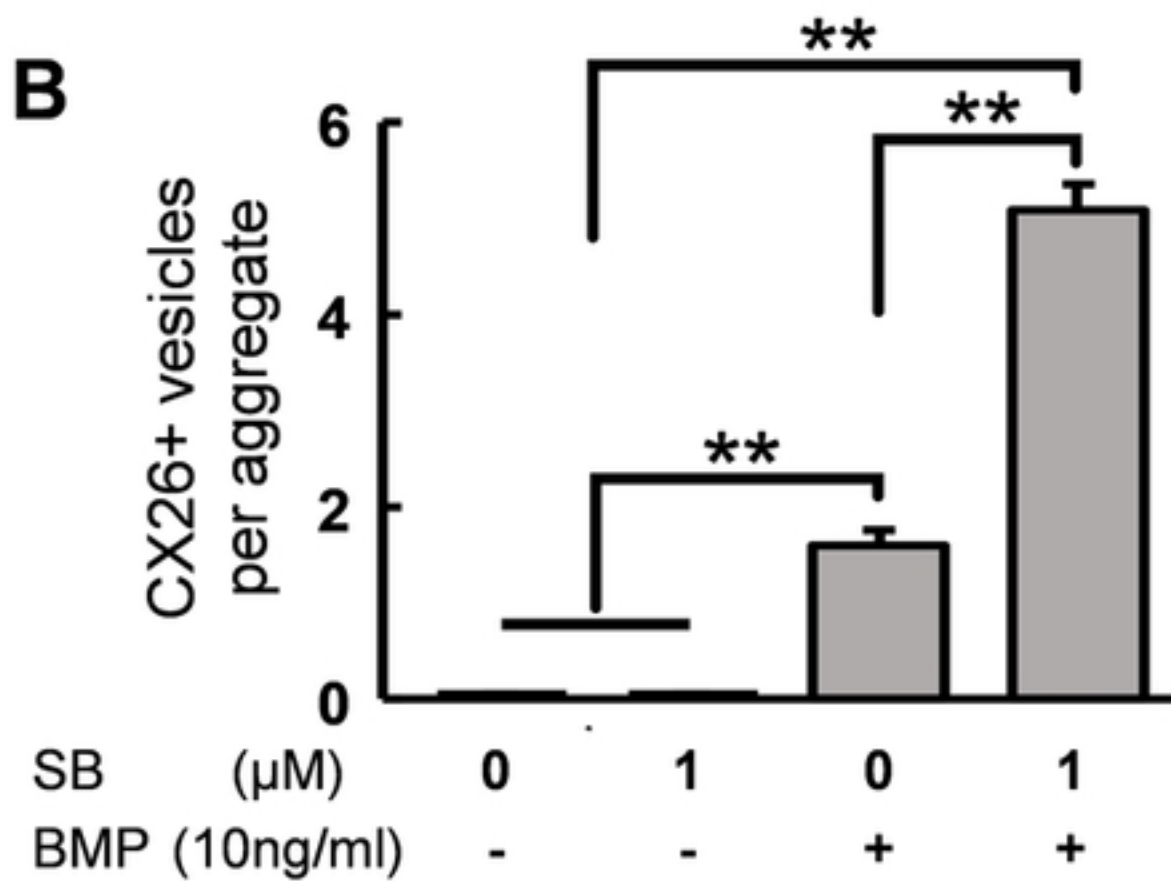

Fig2

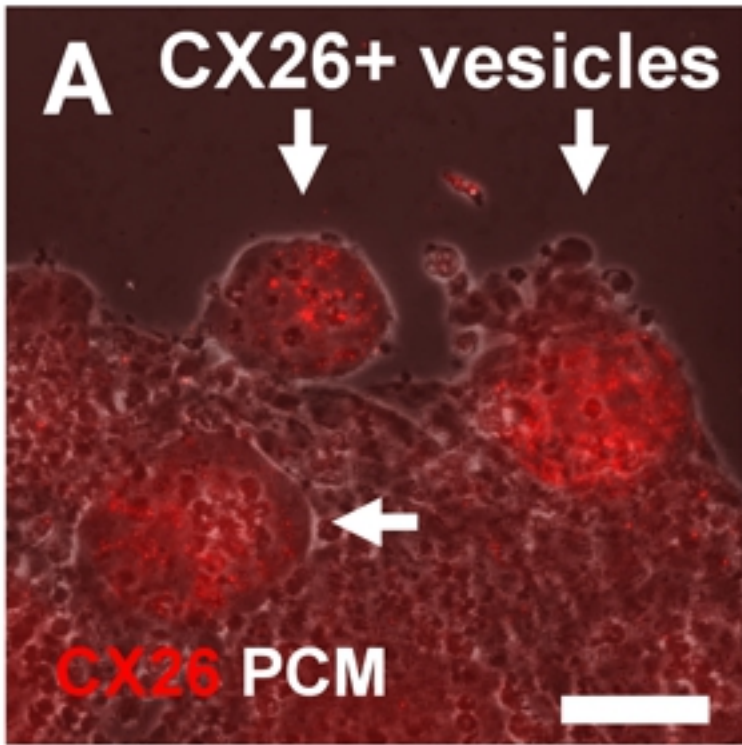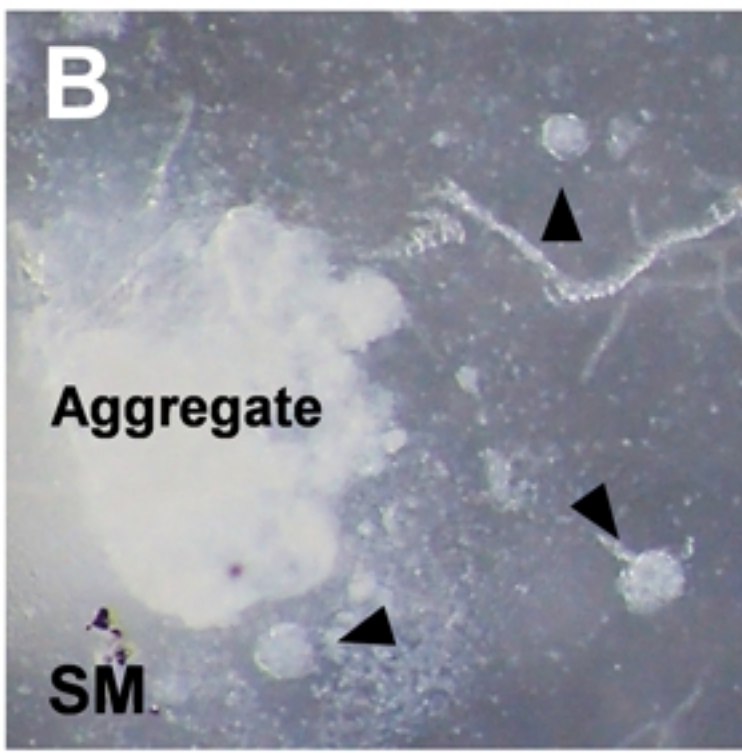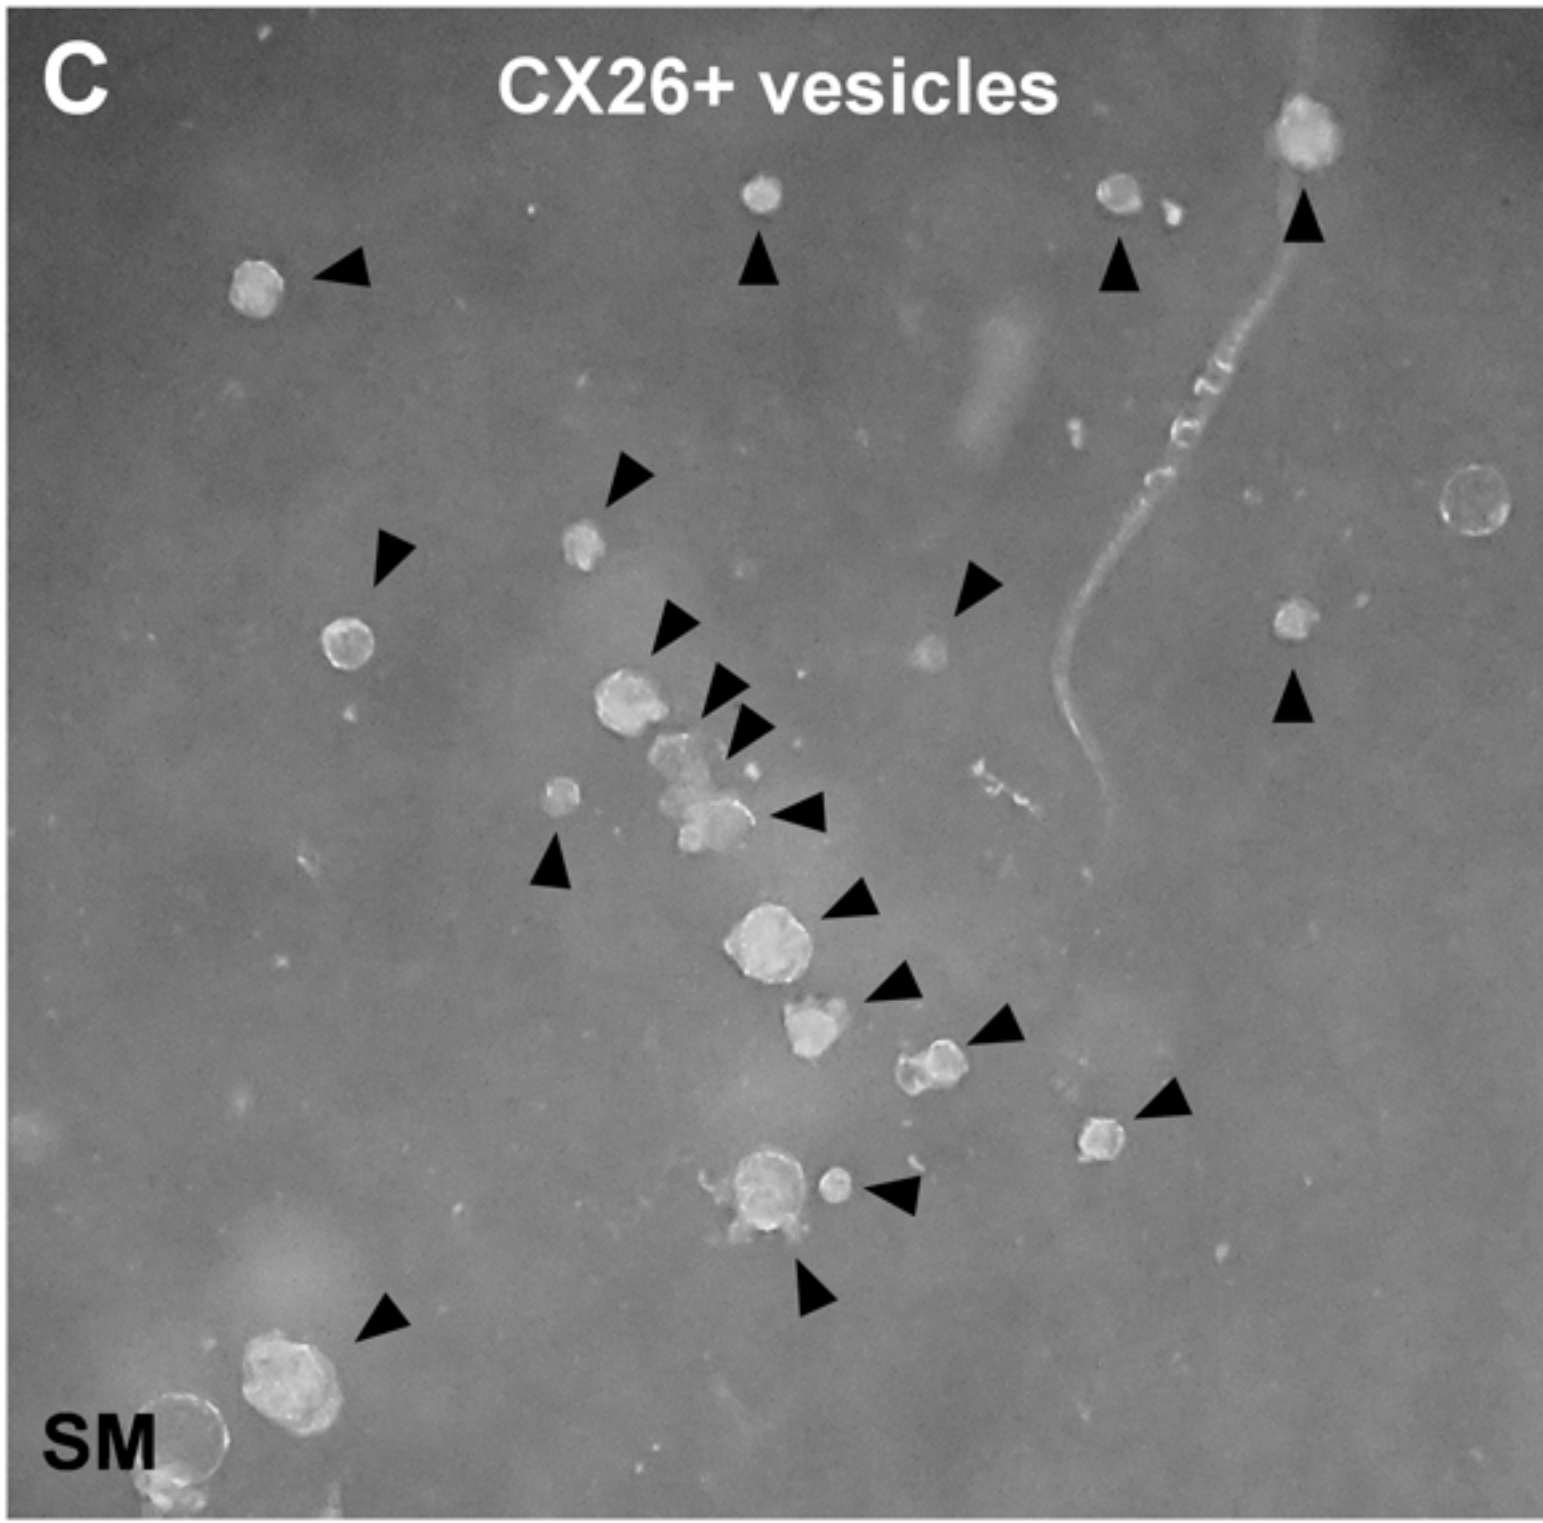

Fig3

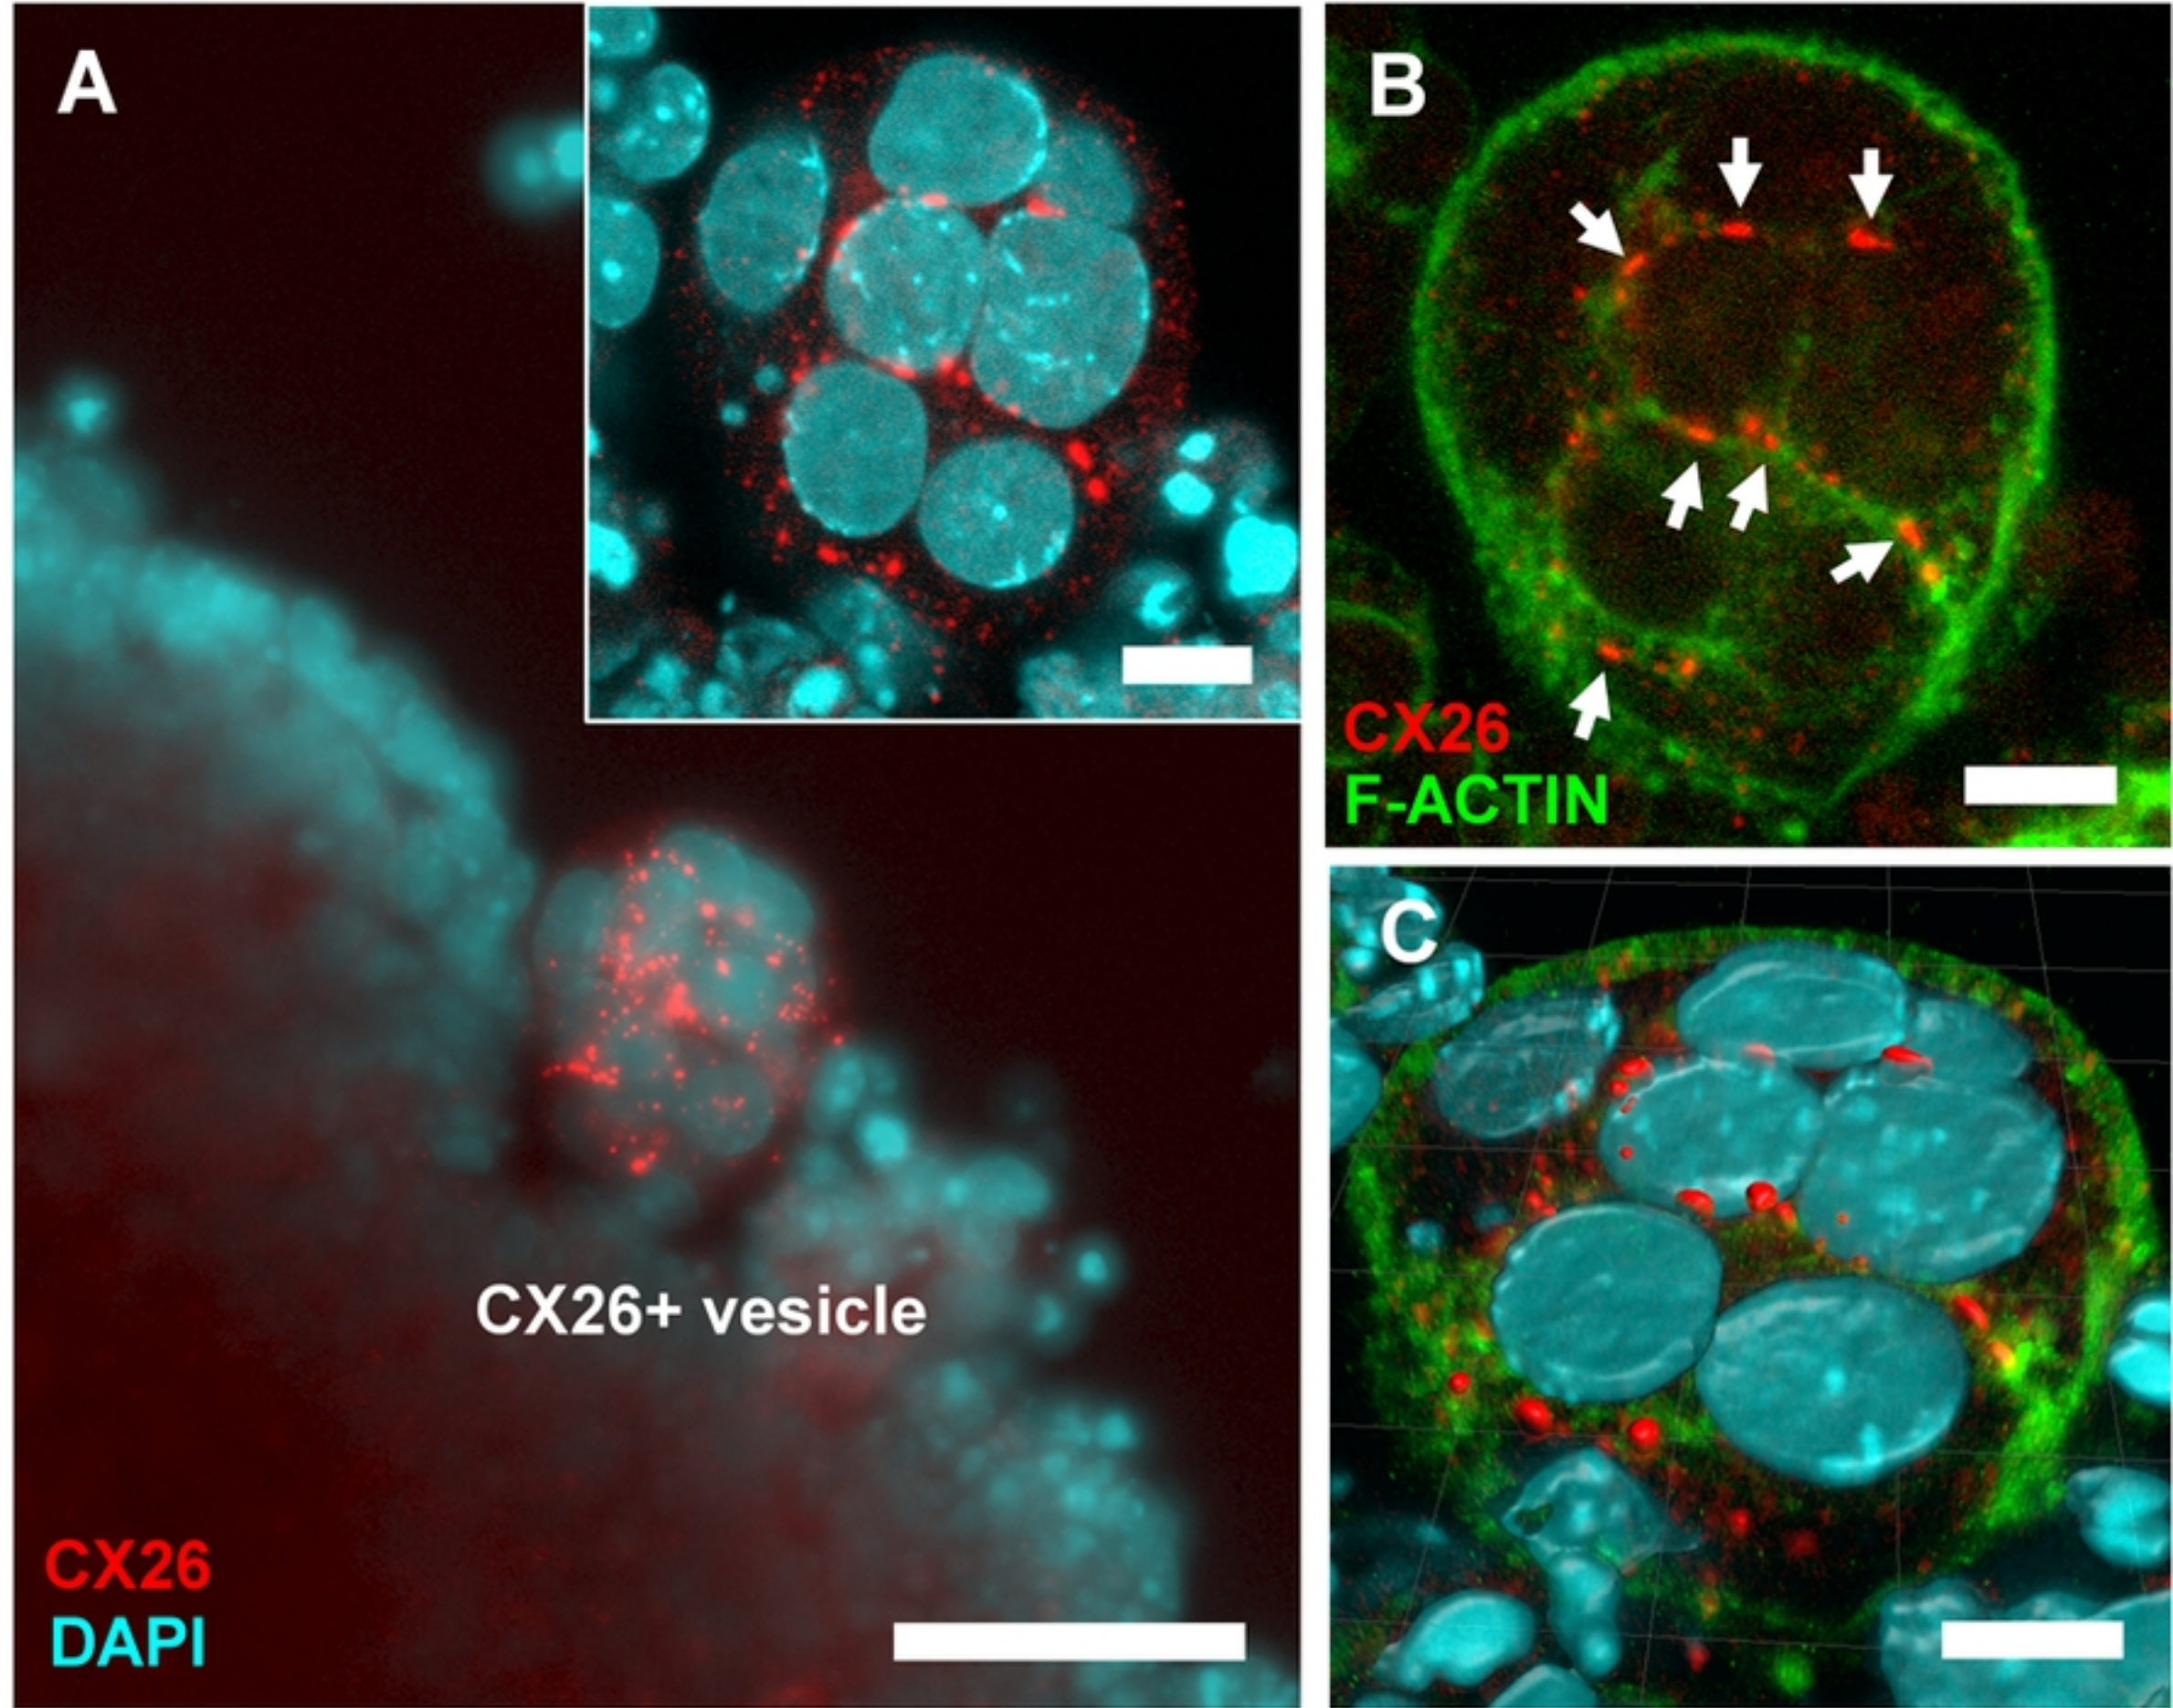

Fig4

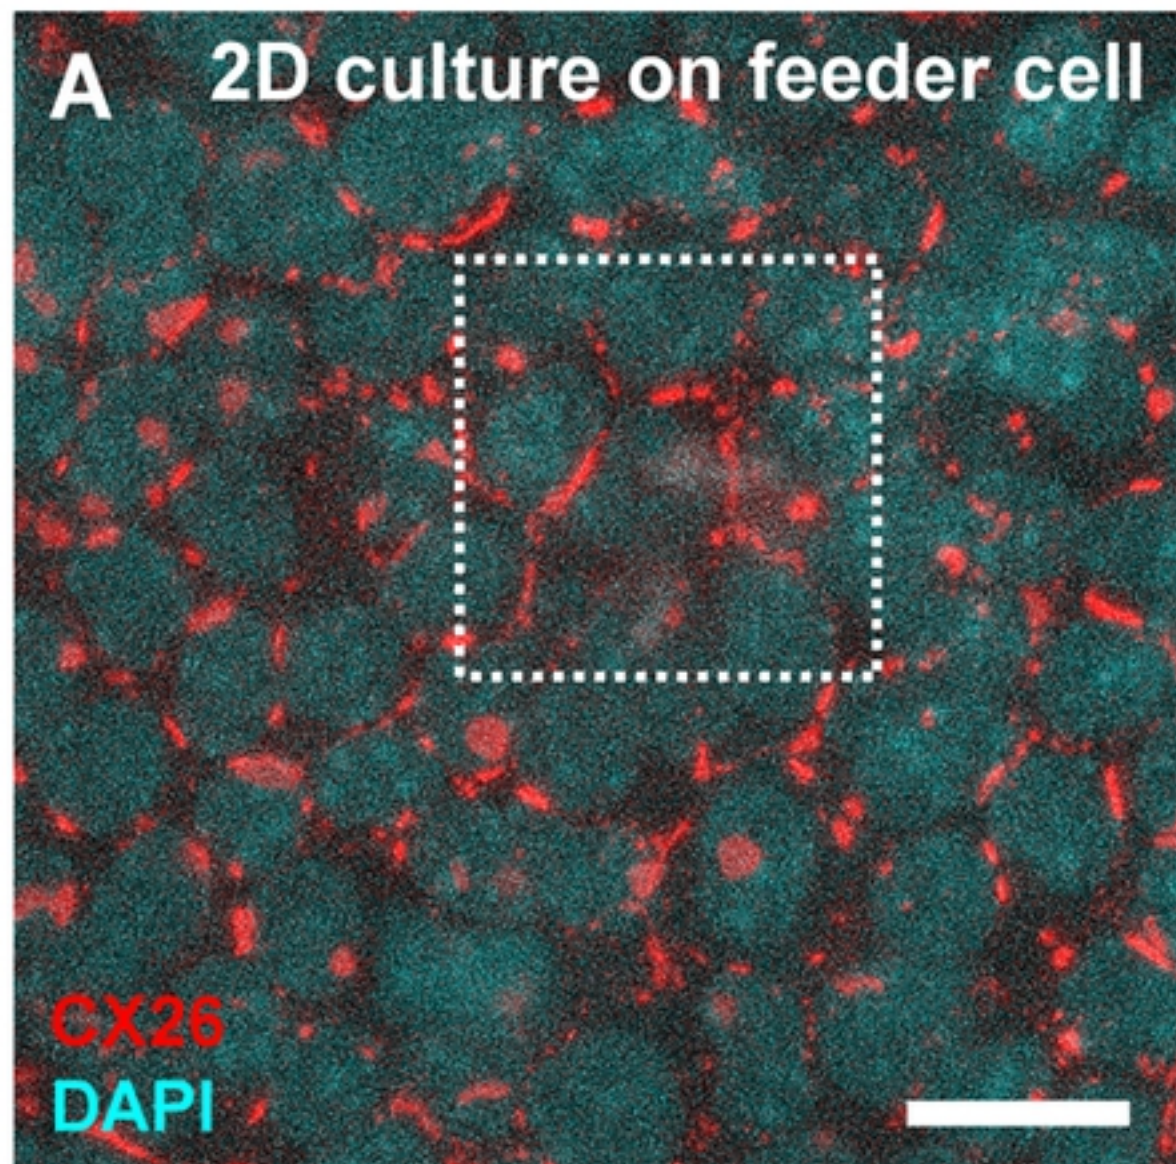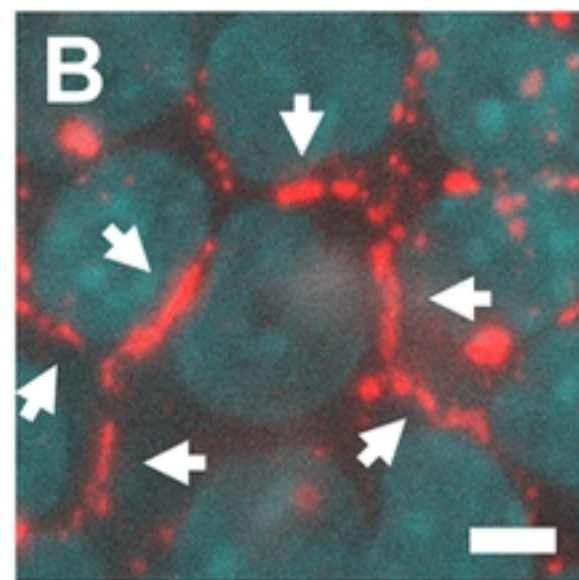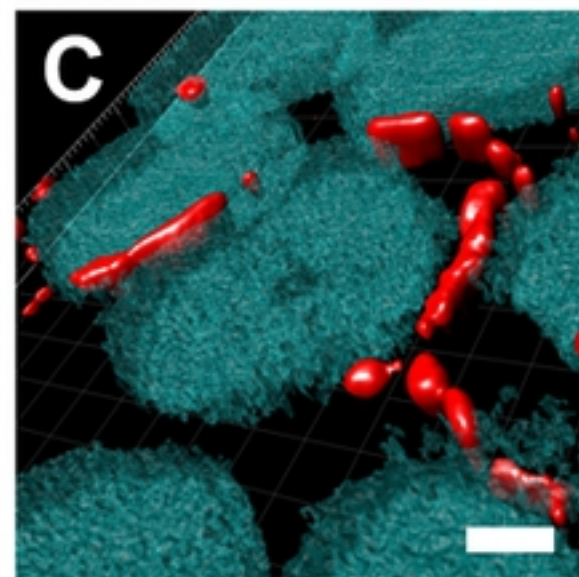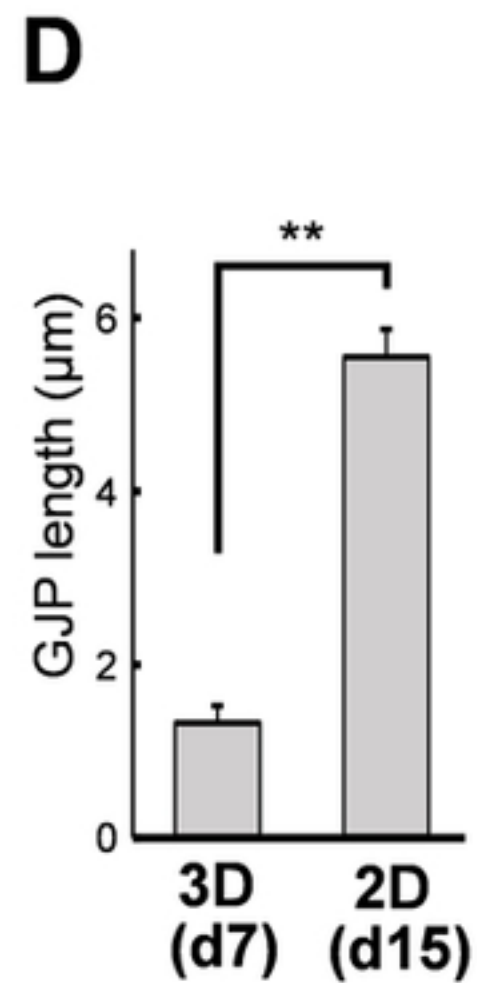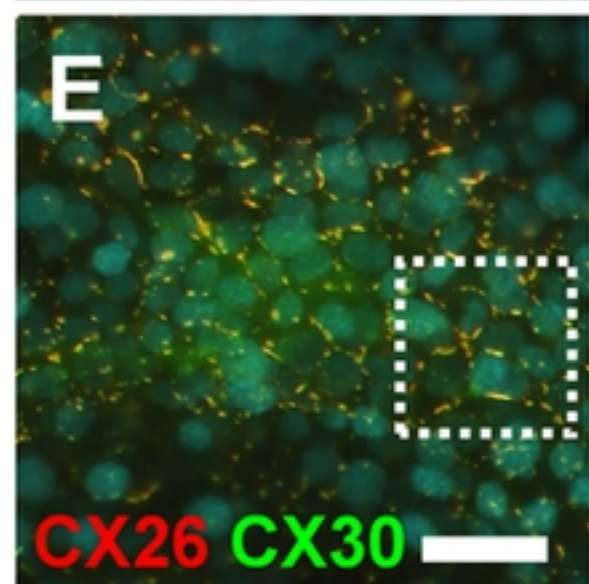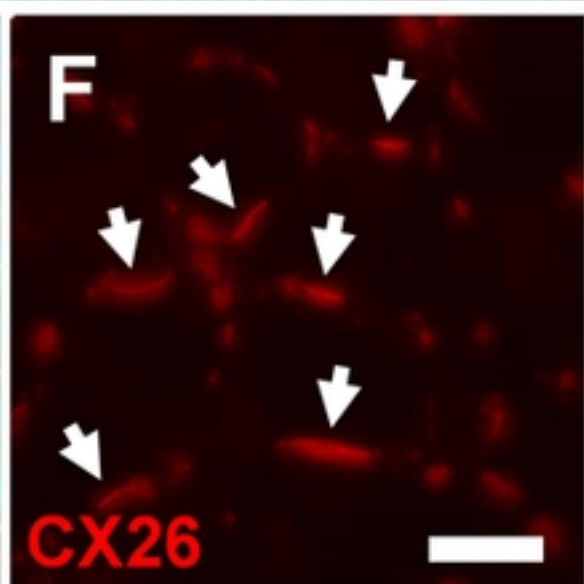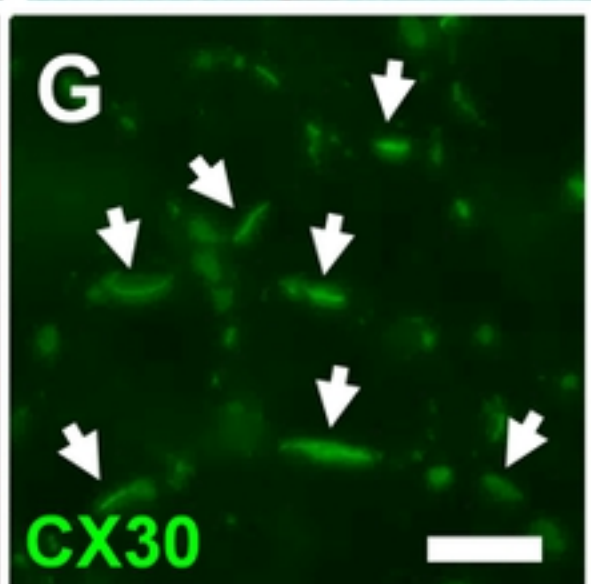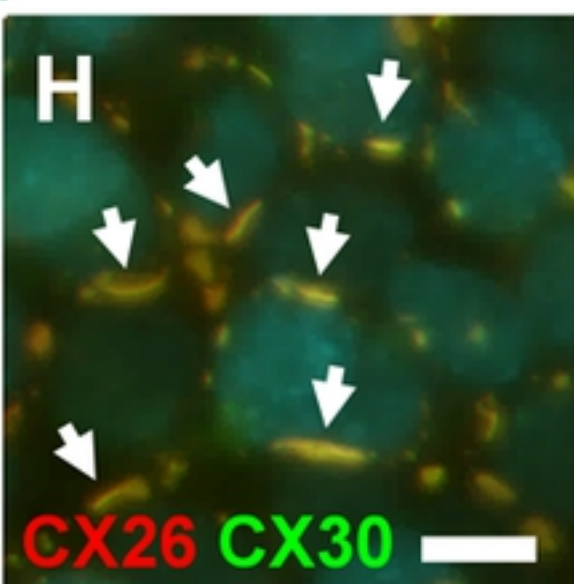

Fig5



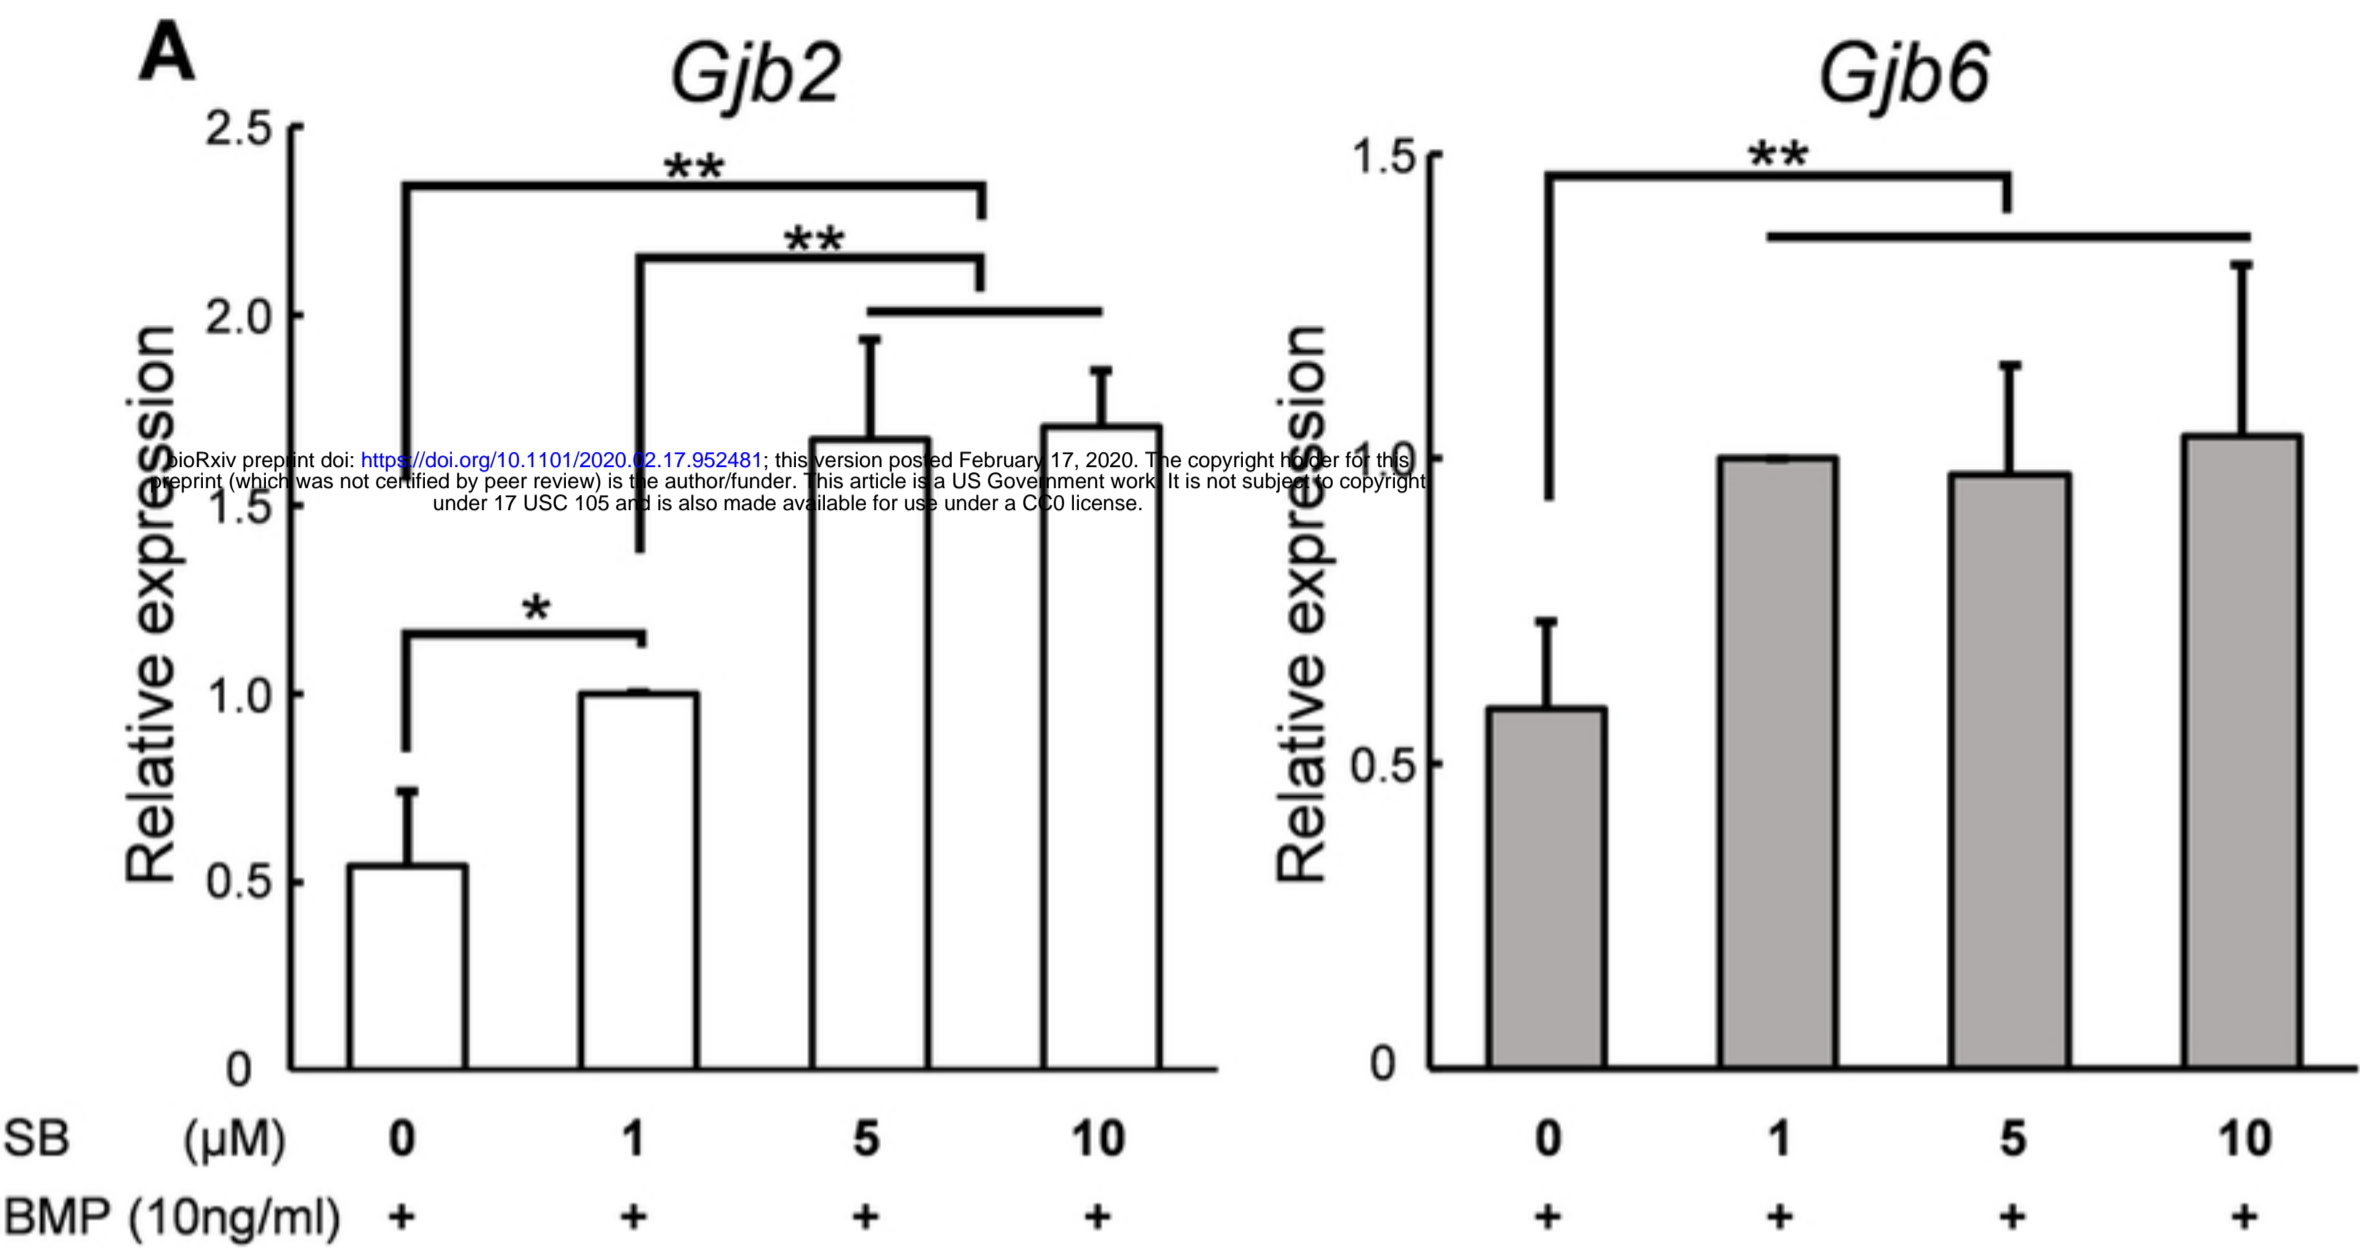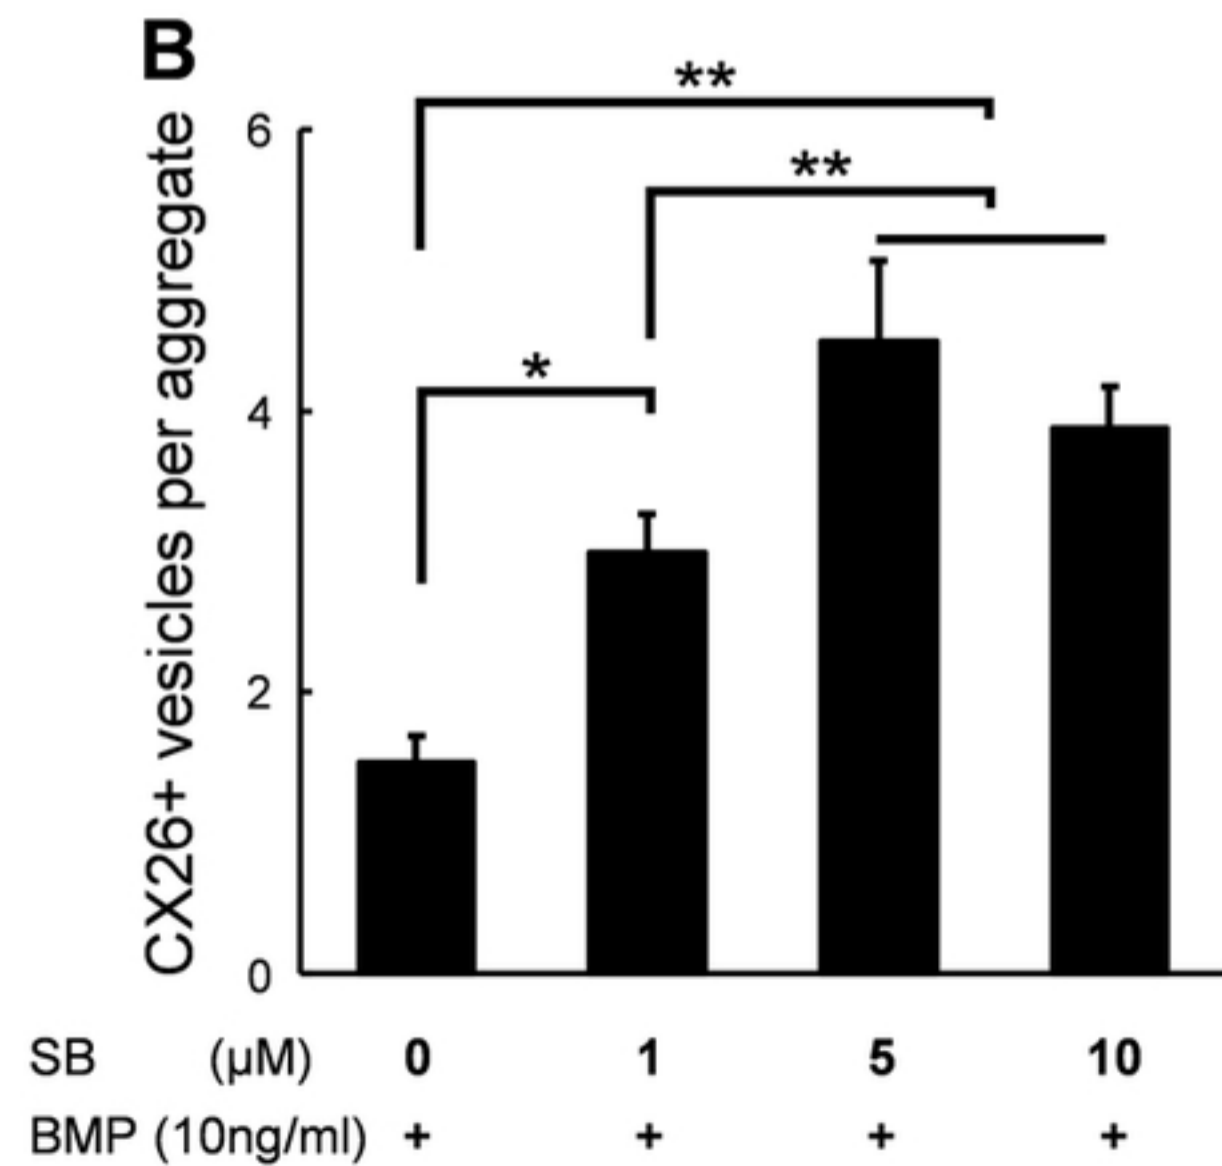

Fig6

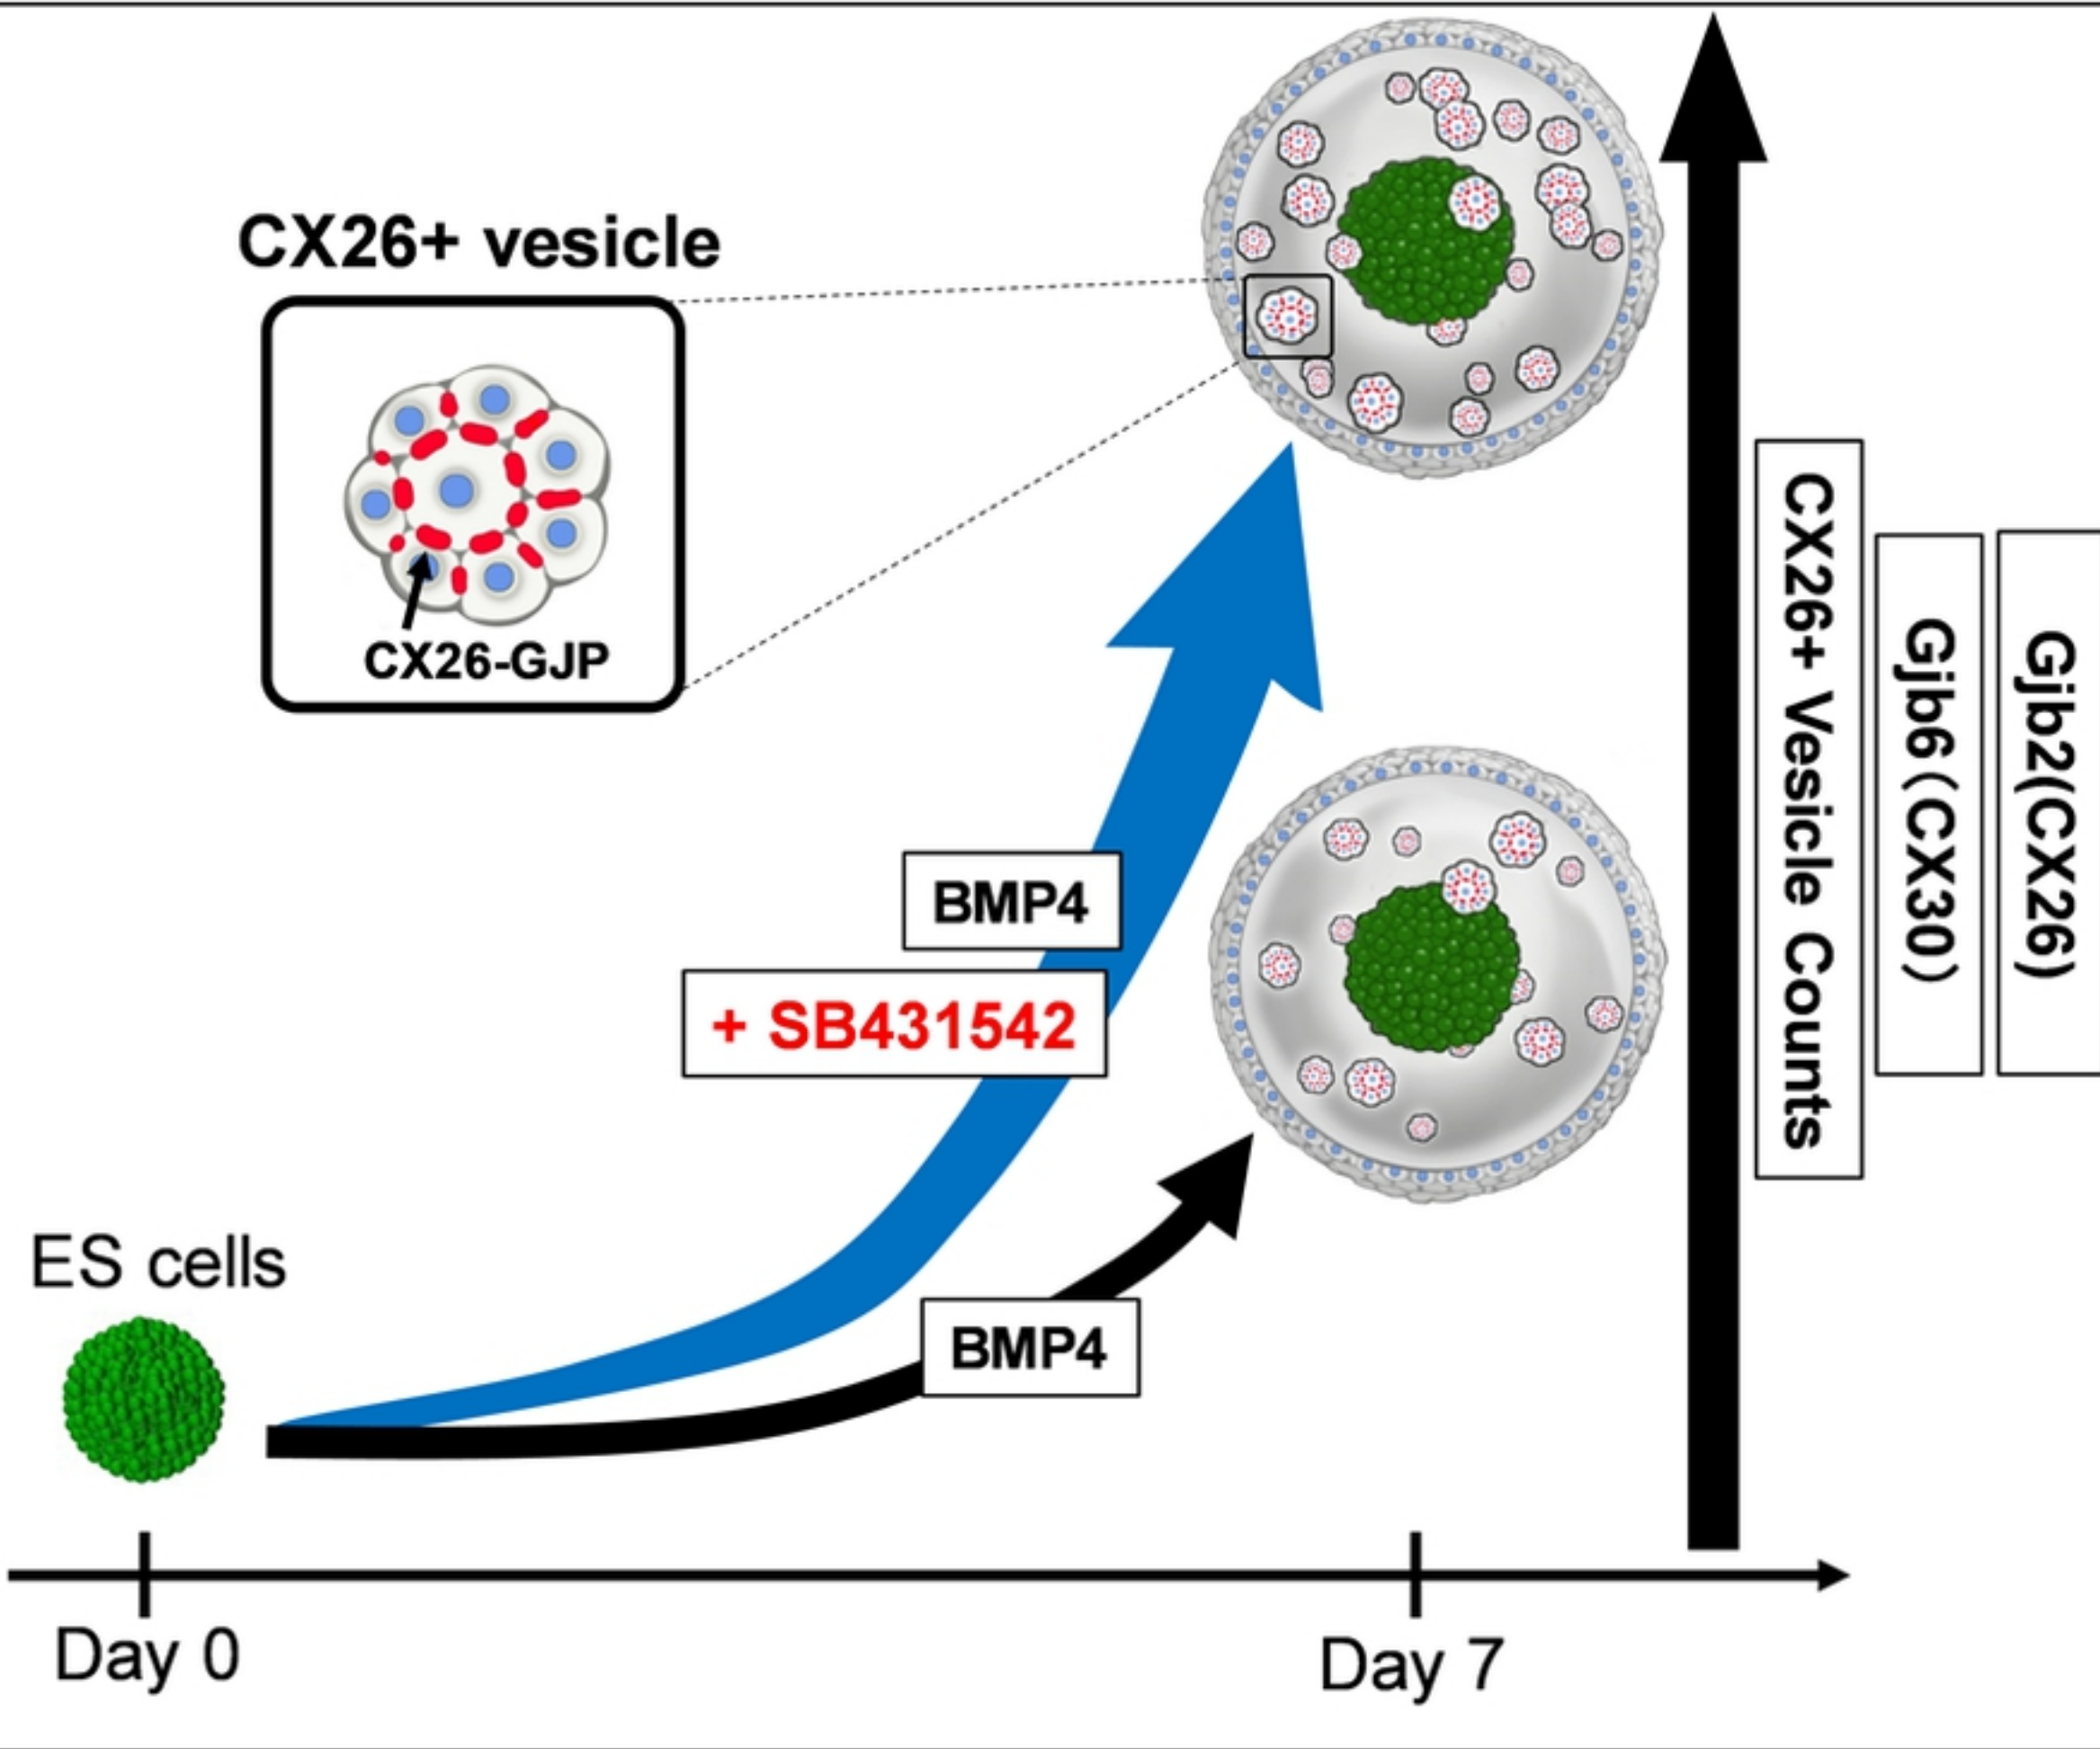

Fig7
